# Supplementary material for: Experimental and computational studies on the formation of cyanate from early metal terminal nitrido ligands and carbon monoxide
Source: Royal Society of Chemistry journal article supplement (doi:10.1039/c3dt52738g), 2014-01-01
Supplement: c3dt52738g.pdf [file c3dt52738g.pdf]

# Experimental and Computational Studies on the Formation of Cyanate from Early Metal Terminal Nitrido Ligands and Carbon Monoxide

Anthony F. Cozzolino, Jared Silvia, Nazario Lopez, Christopher C. Cummins

## Supplementary Information

## Contents

|                                                                                                                                                                             |    |
|-----------------------------------------------------------------------------------------------------------------------------------------------------------------------------|----|
| Figure S1. $^1\text{H}$ NMR spectrum of <b>5</b> in $\text{C}_6\text{D}_6$ .....                                                                                            | 4  |
| Figure S2. Transmission IR spectrum of <b>5</b> in pressed KBr. ....                                                                                                        | 5  |
| Figure S3. Diamond ATR-IR spectrum of neat AgOCN from $\text{KC}_8$ reduction of <b>5</b> . ....                                                                            | 6  |
| Figure S4. Transmission IR spectrum of <b>2</b> in pressed KBr from $\text{KC}_8$ reduction of <b>5</b> . ....                                                              | 7  |
| Figure S5. $^1\text{H}$ NMR spectrum of <b>[7][OTf]<sub>2</sub></b> in $\text{C}_6\text{D}_6$ .....                                                                         | 8  |
| Figure S6. Mid-IR transmission spectrum of <b>[7][OTf]<sub>2</sub></b> in KBr.....                                                                                          | 8  |
| Figure S7. $^{19}\text{F}$ NMR spectrum of <b>8</b> in $\text{C}_6\text{D}_6$ . ....                                                                                        | 9  |
| Figure S8. Cyclic voltammograms of <b>1</b> and <b>9</b> . ....                                                                                                             | 9  |
| Figure S9. $^1\text{H}$ NMR spectrum of paramagnetic region of <b>10</b> in $\text{C}_6\text{D}_6$ .....                                                                    | 10 |
| Figure S10. $^2\text{H}$ NMR spectrum of <b>10</b> in THF. ....                                                                                                             | 10 |
| Figure S11. Diamond ATR-FTIR spectrum of <b>10</b> . ....                                                                                                                   | 11 |
| Figure S12. $^1\text{H}$ NMR spectrum of <b>11</b> in $\text{C}_6\text{D}_6$ .....                                                                                          | 12 |
| Figure S13. $^{13}\text{C}$ NMR spectrum of <b>11</b> in $\text{CDCl}_3$ .....                                                                                              | 12 |
| Figure S14. Diamond ATR-FTIR spectrum of <b>11</b> . ....                                                                                                                   | 13 |
| Figure S15. $^1\text{H}$ NMR spectrum of <b>12</b> in $\text{C}_6\text{D}_6$ containing HMDSO for Evans' method. ....                                                       | 14 |
| Figure S16. $^2\text{H}$ NMR spectrum of <b>12</b> in THF containing $\text{C}_6\text{D}_6$ for Evans' method.....                                                          | 14 |
| Figure S17. Diamond ATR-FTIR spectrum of <b>12</b> . ....                                                                                                                   | 15 |
| Figure S18. $^1\text{H}$ NMR spectrum of <b>13</b> in $\text{C}_6\text{D}_6$ .....                                                                                          | 16 |
| Figure S19. $^2\text{H}$ NMR spectrum of <b>13</b> in $\text{C}_6\text{H}_6$ . ....                                                                                         | 16 |
| Figure S20. Diamond ATR-FTIR spectrum of <b>13</b> . ....                                                                                                                   | 17 |
| Figure S21. DFT modeled UV/VIS absorption spectrum of <b>5</b> with a Lorentzian broadening of 50 applied to first 100 roots.....                                           | 20 |
| <br>                                                                                                                                                                        |    |
| Table S1. Crystal data and refinement parameters for $\alpha$ - <b>5</b> , $\beta$ - <b>5</b> , <b>7</b> and <b>10</b> . ....                                               | 18 |
| Table S2. Crystal data and refinement parameters for <b>11</b> , <b>12</b> , <b>13</b> and <b>14</b> . ....                                                                 | 19 |
| <b>Table S3</b> . Cartesian coordinates for DFT optimized $(\text{CH}_3)_4\text{Si}$ . ....                                                                                 | 20 |
| <b>Table S4</b> . Cartesian coordinates for DFT optimized <b>5</b> ( $S = 1$ ).....                                                                                         | 21 |
| <b>Table S5</b> . Cartesian coordinates for DFT optimized CO.....                                                                                                           | 23 |
| <b>Table S6</b> . Cartesian coordinates for DFT optimized <b>1-mod</b> ( $S = 0$ ) constrained to have the same coordination geometry as <b>1</b> . ....                    | 23 |
| <b>Table S7</b> . Cartesian coordinates for DFT optimized <b>5-mod</b> ( $S = 1$ ), constrained to have the same coordination geometry as <b>5</b> . ....                   | 24 |
| <b>Table S8</b> . Cartesian coordinates for DFT optimized intermediate in reaction of CO with <b>1-mod</b> on path to <b>5-mod</b> ( $S = 0$ ) where CO binds to metal..... | 25 |
| <b>Table S9</b> . Cartesian coordinates for DFT optimized <b>1</b> . ....                                                                                                   | 26 |
| <b>Table S10</b> . Cartesian coordinates for DFT optimized <b>9</b> ( $S = 0$ ).....                                                                                        | 28 |
| <b>Table S11</b> . Cartesian coordinates for DFT optimized $\text{OCN-Mo}(\text{N}[\text{R}]\text{Ar}_F)_3$ ( $S = 1$ ). ....                                               | 30 |
| <b>Table S12</b> . Cartesian coordinates for DFT optimized <b>4</b> ( $S = 0$ ).....                                                                                        | 32 |

|                                                                                                                                                             |    |
|-------------------------------------------------------------------------------------------------------------------------------------------------------------|----|
| <b>Table S13.</b> Cartesian coordinates for DFT optimized OCN–V(nacnac)(N[ <i>p</i> -tol] <sub>2</sub> ) (S = 1).....                                       | 34 |
| <b>Table S14.</b> Cartesian coordinates for DFT optimized <b>4-mod</b> (S = 0).....                                                                         | 37 |
| <b>Table S15.</b> Cartesian coordinates for DFT optimized product of CO and <b>4-mod</b> (S = 1). ....                                                      | 38 |
| <b>Table S16.</b> Cartesian coordinates for DFT optimized intermediate product on reaction pathway of CO + <b>4-mod</b> (S = 0).....                        | 38 |
| <b>Table S17.</b> Cartesian coordinates for DFT optimized <b>11</b> (S = 0).....                                                                            | 39 |
| <b>Table S18.</b> Cartesian coordinates for DFT optimized OCN(N <sub>3</sub> )Mo(N[R]Ar <sub>MeL</sub> ) <sub>2</sub> (S = 1). ....                         | 41 |
| <b>Table S19.</b> Cartesian coordinates for constrained H-atom only DFT optimization of <b>12</b> starting from crystal structure coordinates (S = 1). .... | 43 |
| <b>Table S20.</b> Cartesian coordinates for H-atom only DFT optimization of <b>13</b> starting from crystal structure coordinates(S = 1.5). ....            | 45 |

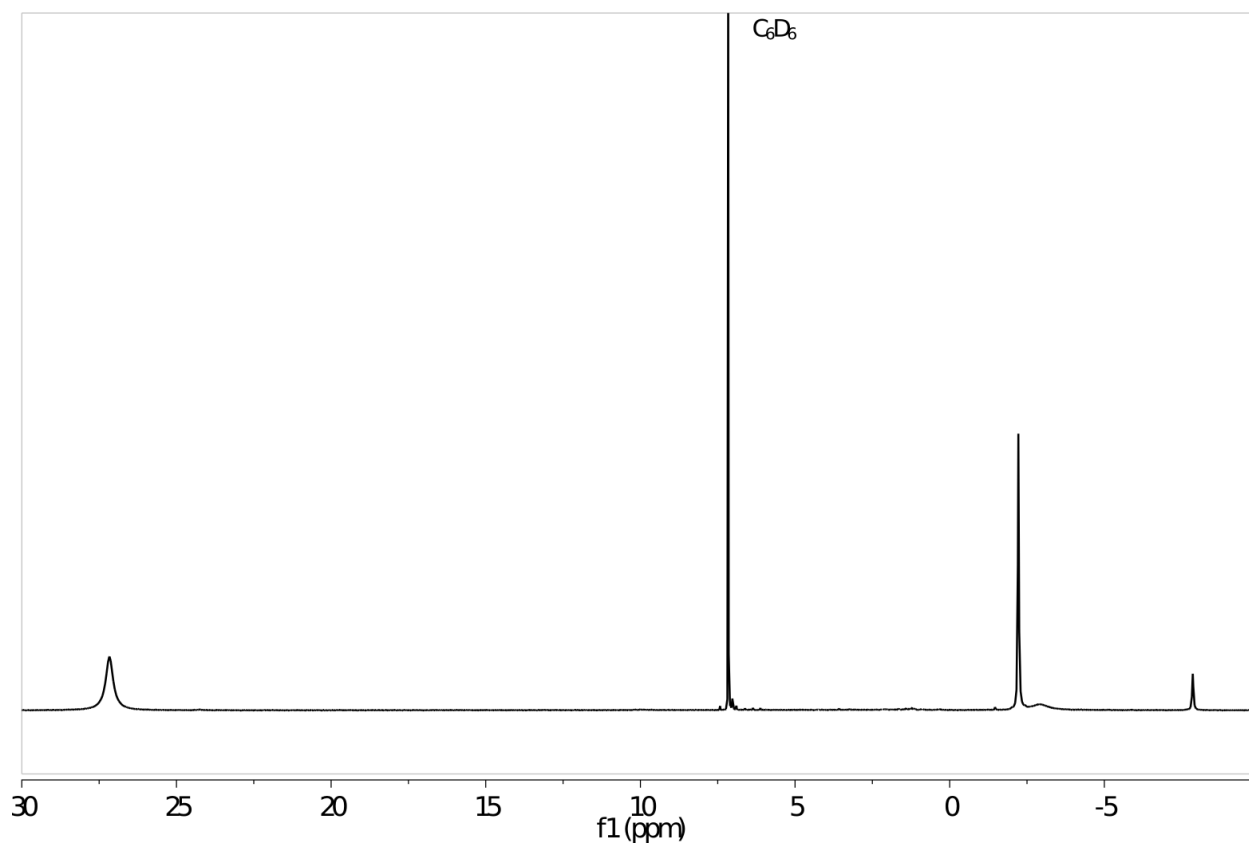

**Figure S1.**  $^1\text{H}$  NMR spectrum of **5** in  $\text{C}_6\text{D}_6$ .

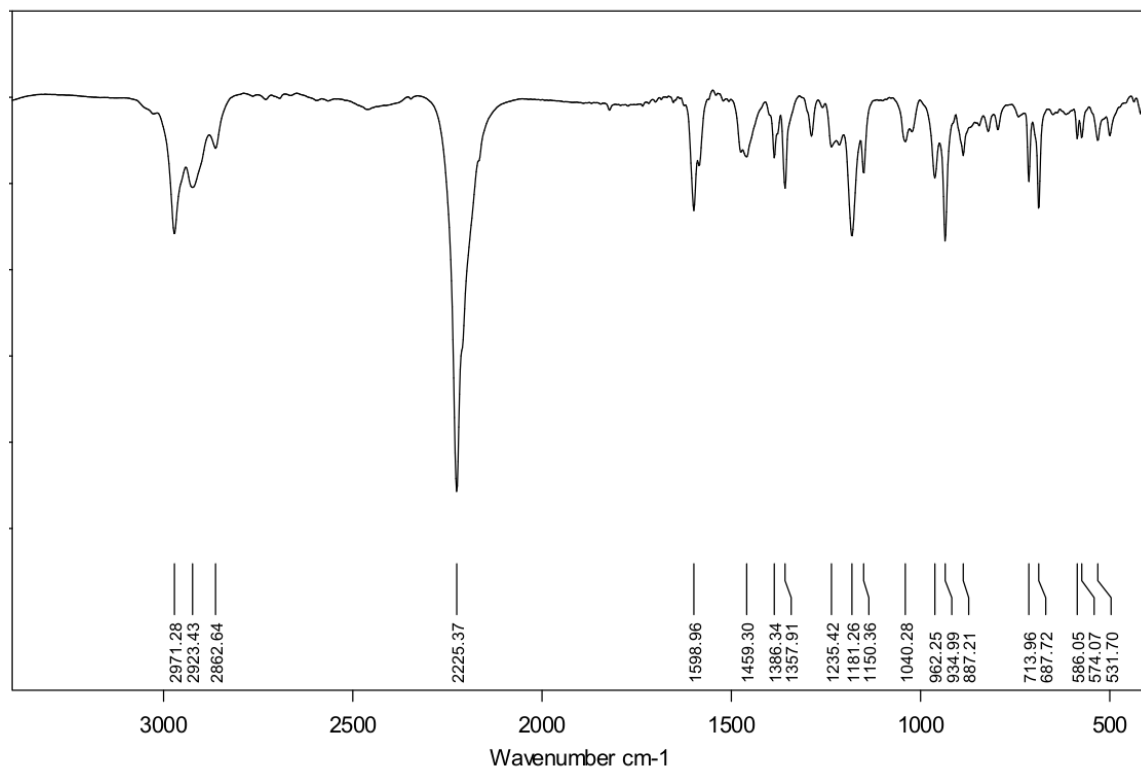

**Figure S2.** Transmission IR spectrum of **5** in pressed KBr.

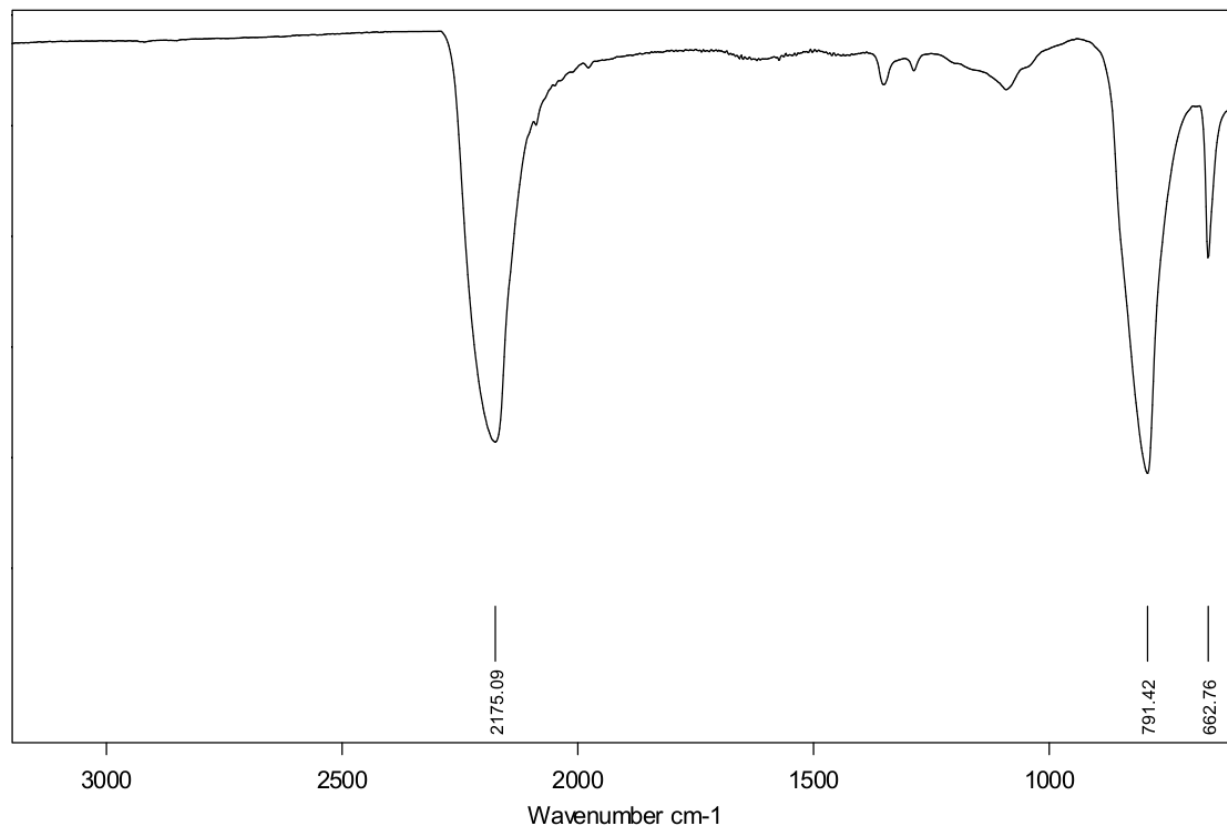

**Figure S3.** Diamond ATR-IR spectrum of neat AgOCN from KC<sub>8</sub> reduction of **5**.

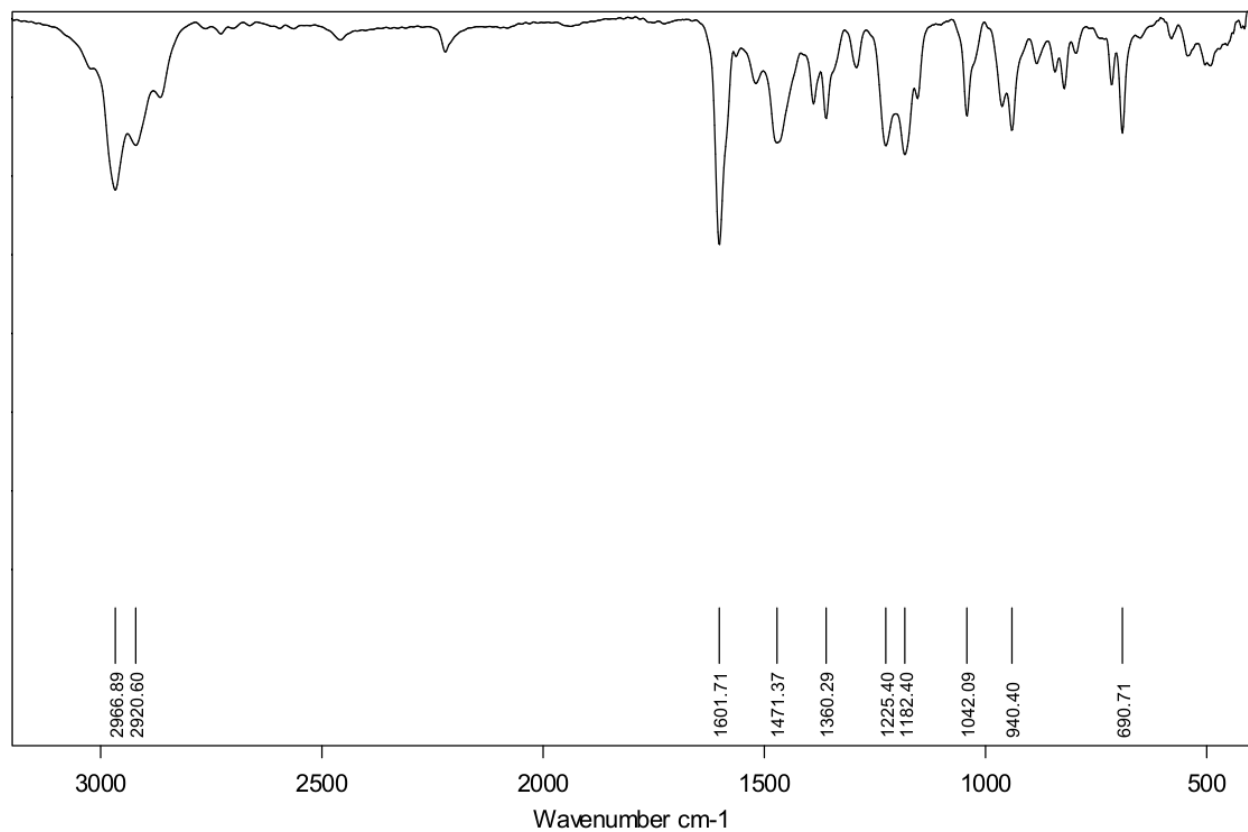

**Figure S4.** Transmission IR spectrum of **2** in pressed KBr from  $KC_8$  reduction of **5**.

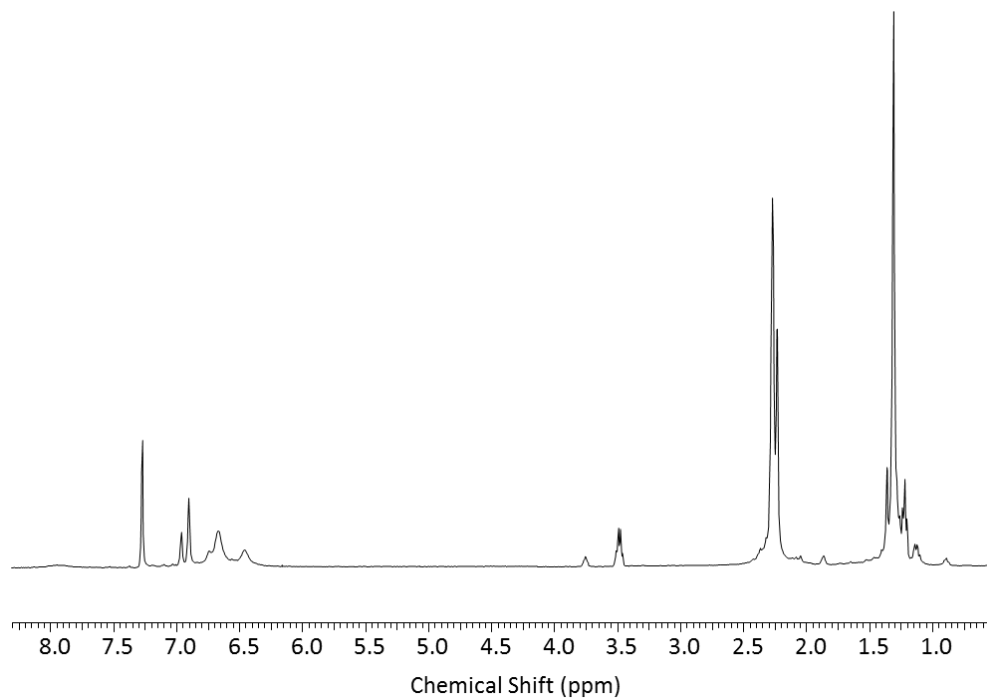

**Figure S5.**  $^1\text{H}$  NMR spectrum of  $[\mathbf{7}][\text{OTf}]_2$  in  $\text{C}_6\text{D}_6$ .

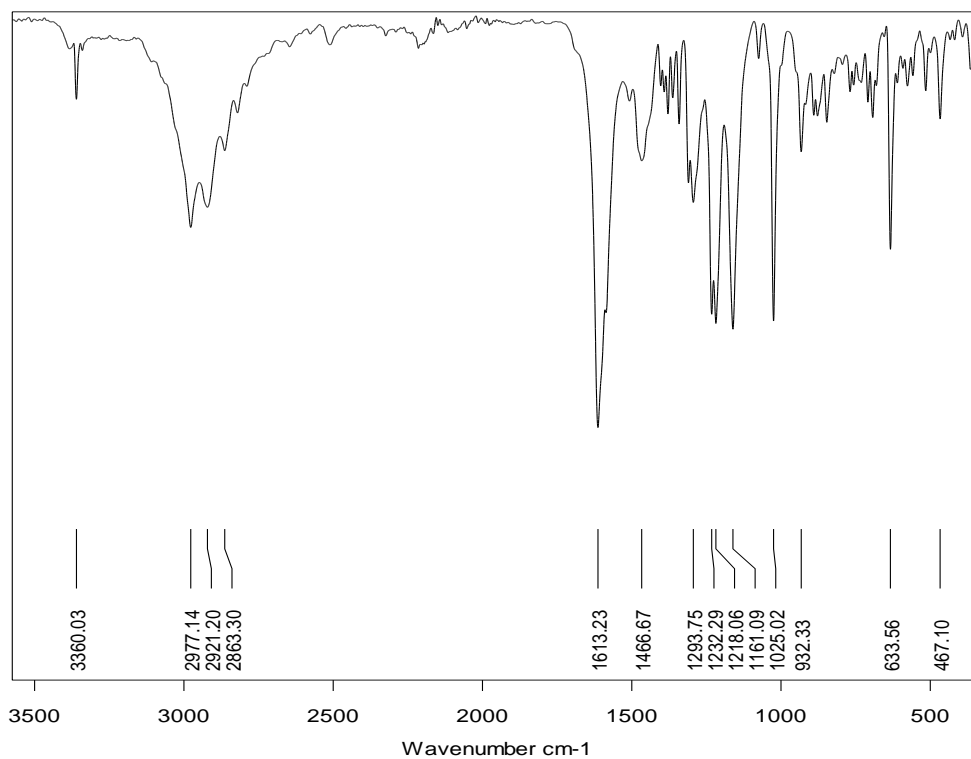

**Figure S6.** Mid-IR transmission spectrum of  $[\mathbf{7}][\text{OTf}]_2$  in KBr.



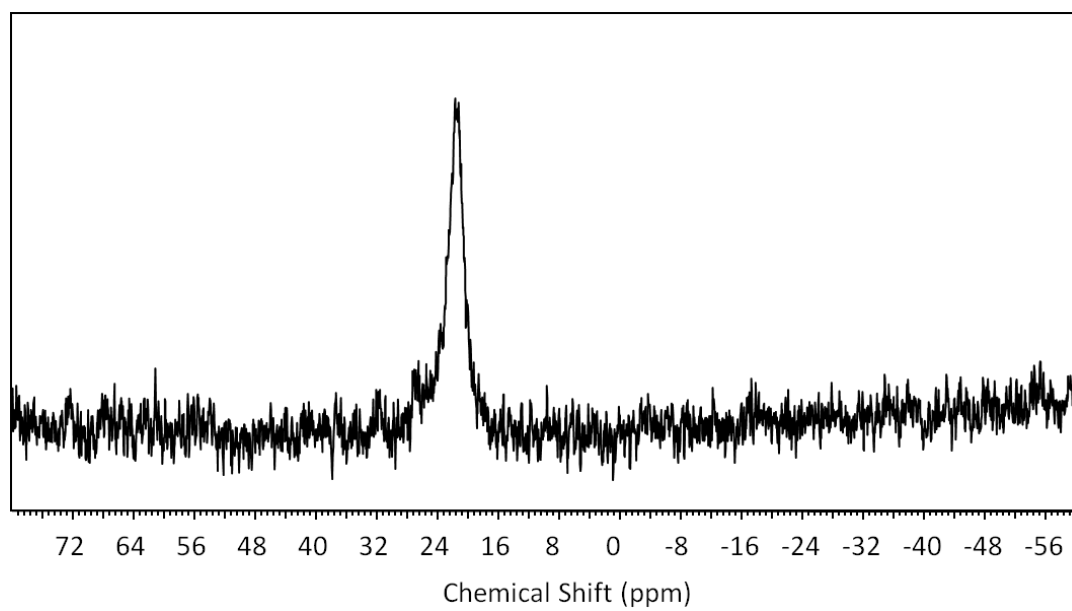

**Figure S7.**  $^{19}\text{F}$  NMR spectrum of **8** in  $\text{C}_6\text{D}_6$ .

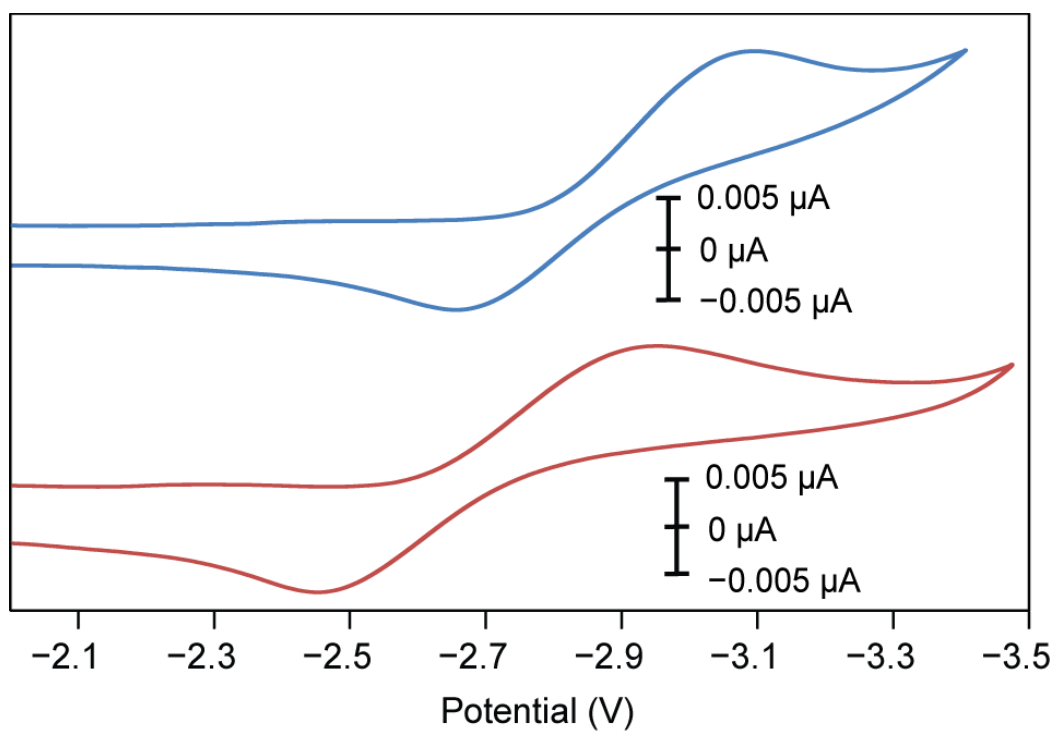

**Figure S8.** Cyclic voltammograms of **1** (blue) and **9** (red) in 0.1 M  $[\text{Bu}_4\text{N}][\text{B}(\text{C}_6\text{F}_5)_4]$  in THF referenced to  $\text{Fc}/\text{Fc}^+$  with a scan rate of 300 mV/sec..

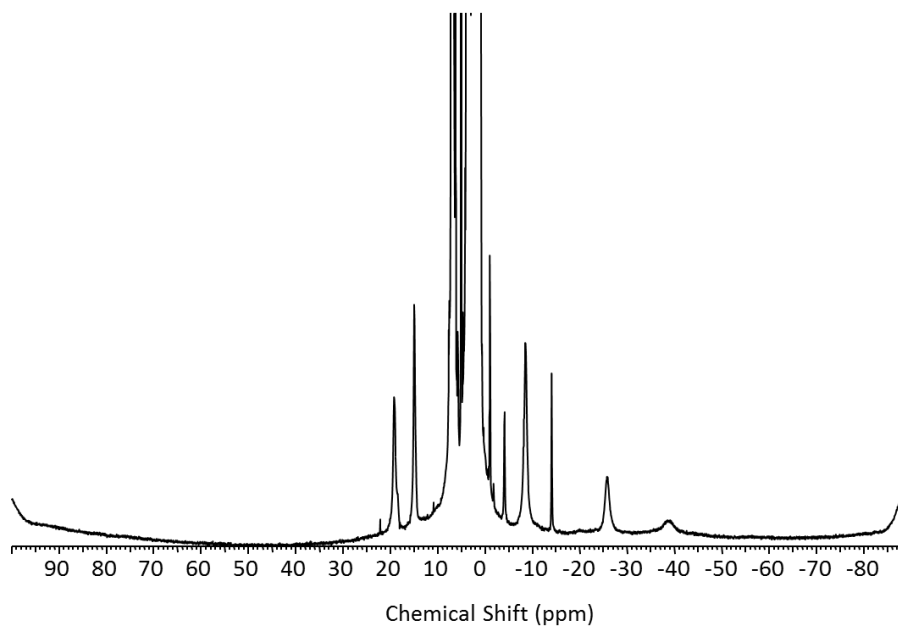

**Figure S9.**  $^1\text{H}$  NMR spectrum of paramagnetic region of **10** in  $\text{C}_6\text{D}_6$ .

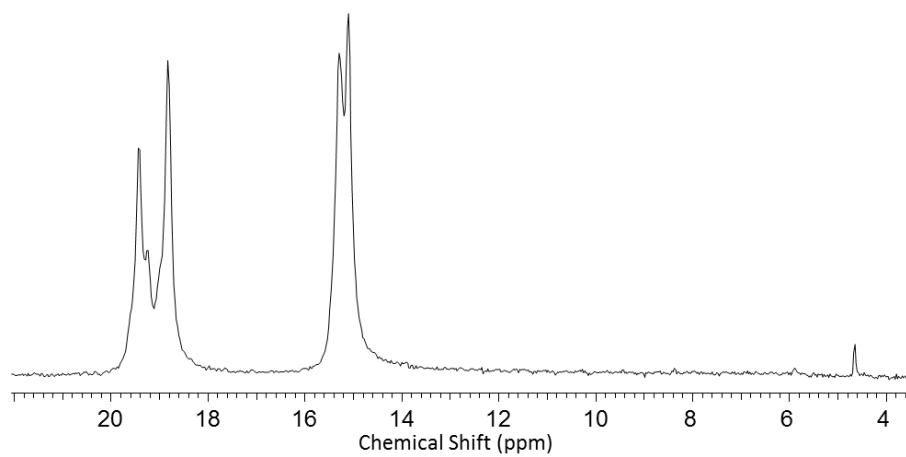

**Figure S10.**  $^2\text{H}$  NMR spectrum of **10** in THF.

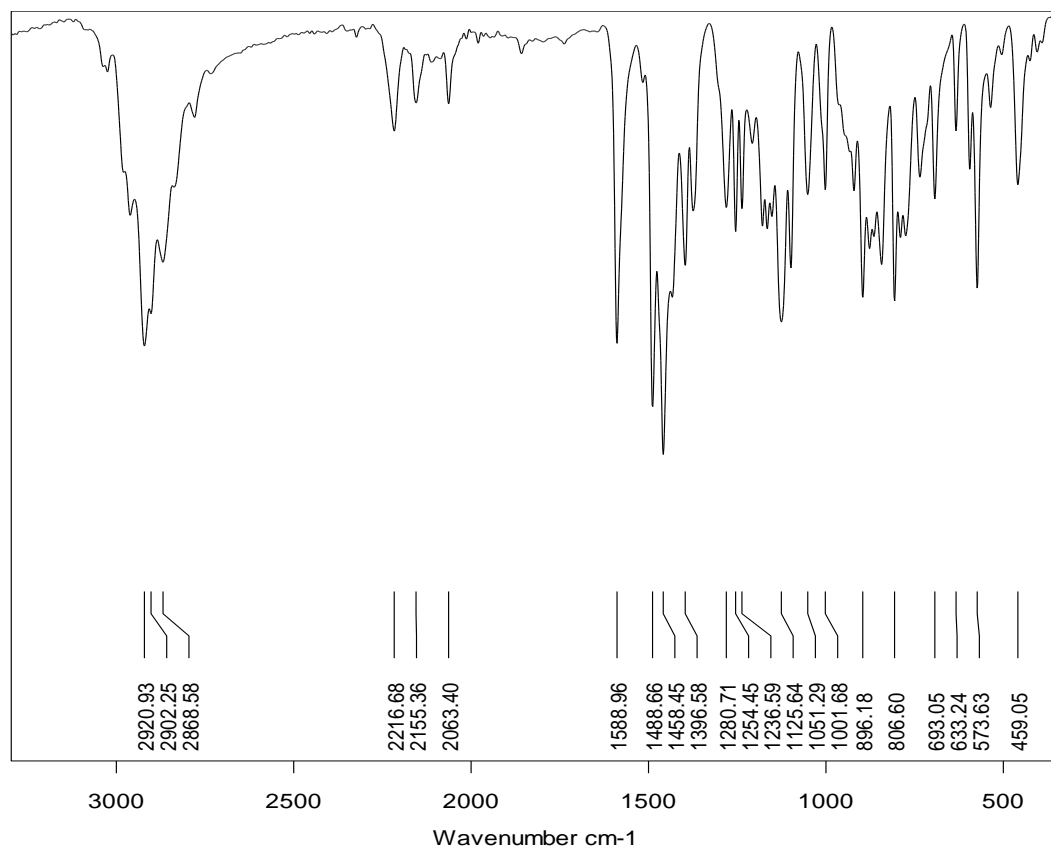

**Figure S11.** Diamond ATR-FTIR spectrum of **10**.

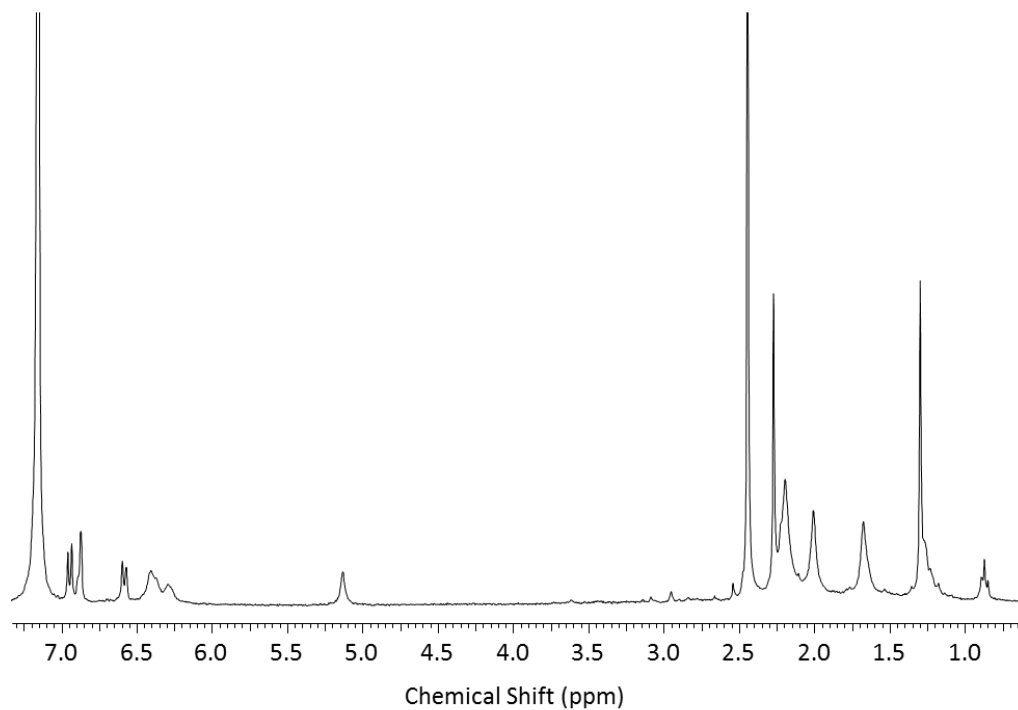

**Figure S12.**  $^1\text{H}$  NMR spectrum of **11** in  $\text{C}_6\text{D}_6$ .

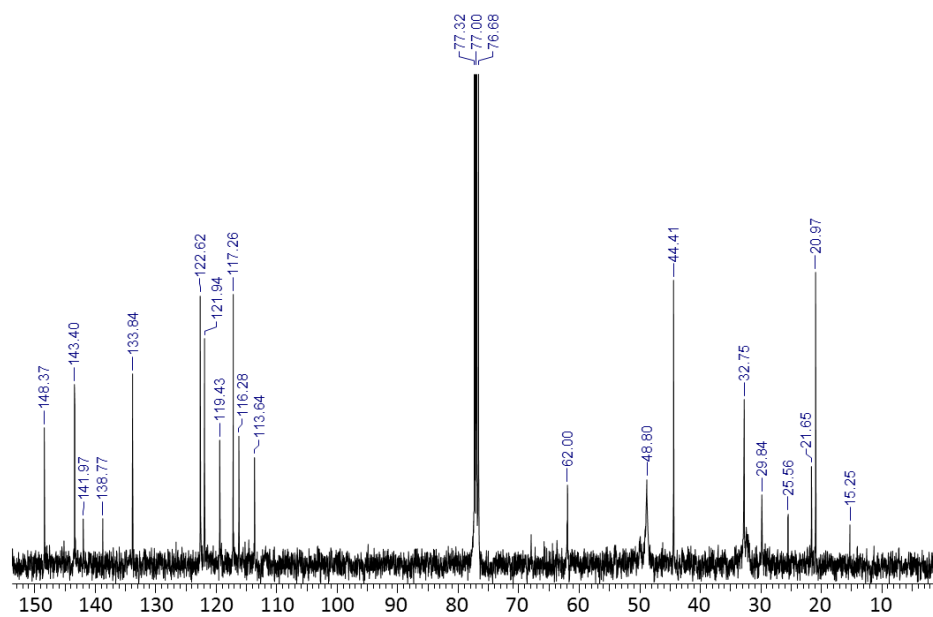

**Figure S13.**  $^{13}\text{C}$  NMR spectrum of **11** in  $\text{CDCl}_3$ .

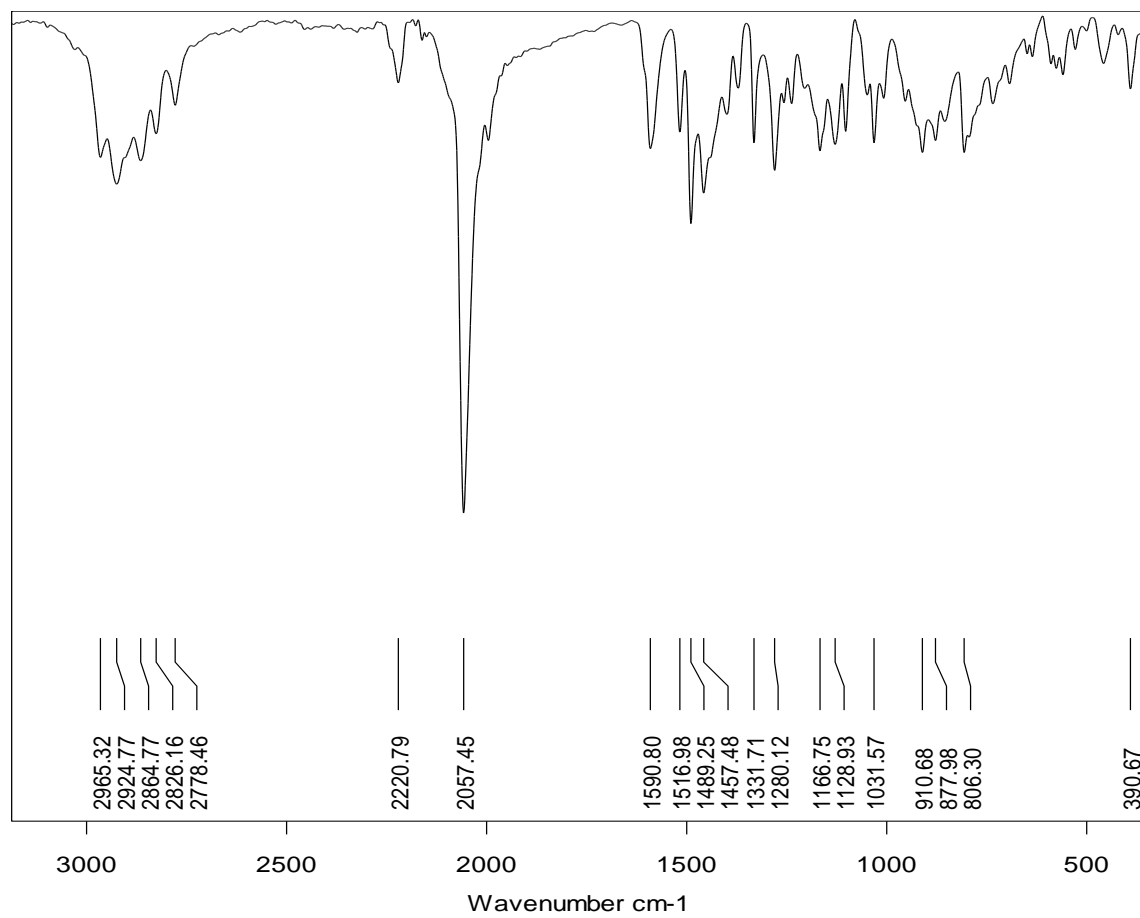

**Figure S14.** Diamond ATR-FTIR spectrum of **11**.

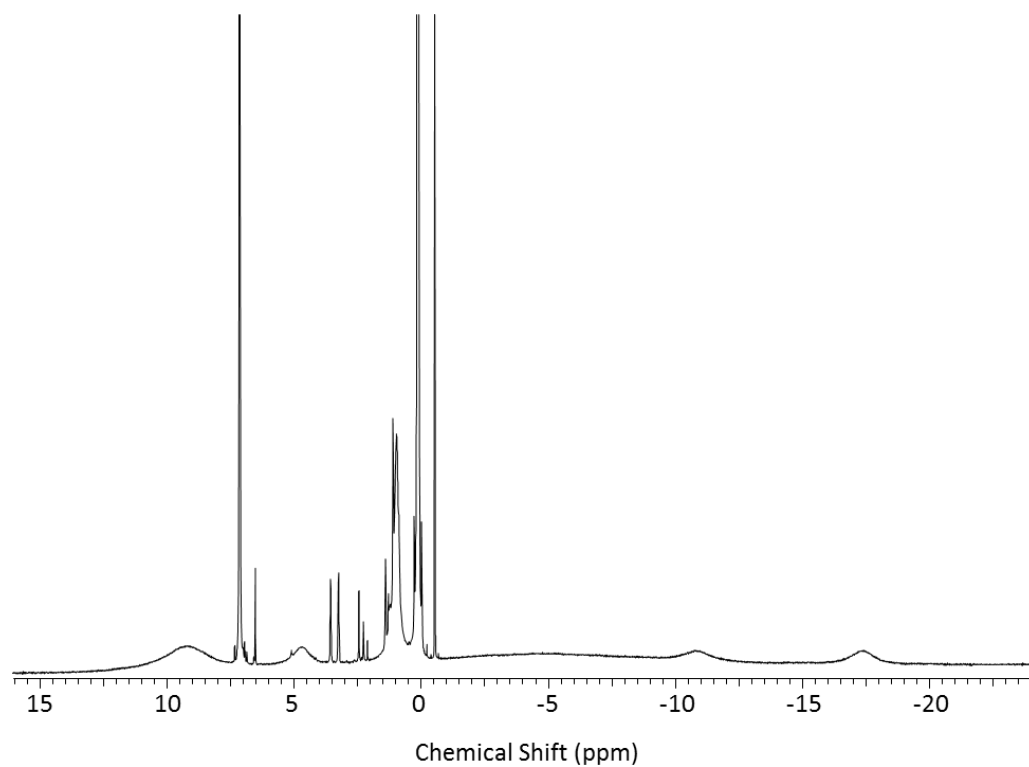

**Figure S15.** <sup>1</sup>H NMR spectrum of **12** in C<sub>6</sub>D<sub>6</sub> containing HMDSO for Evans' method.

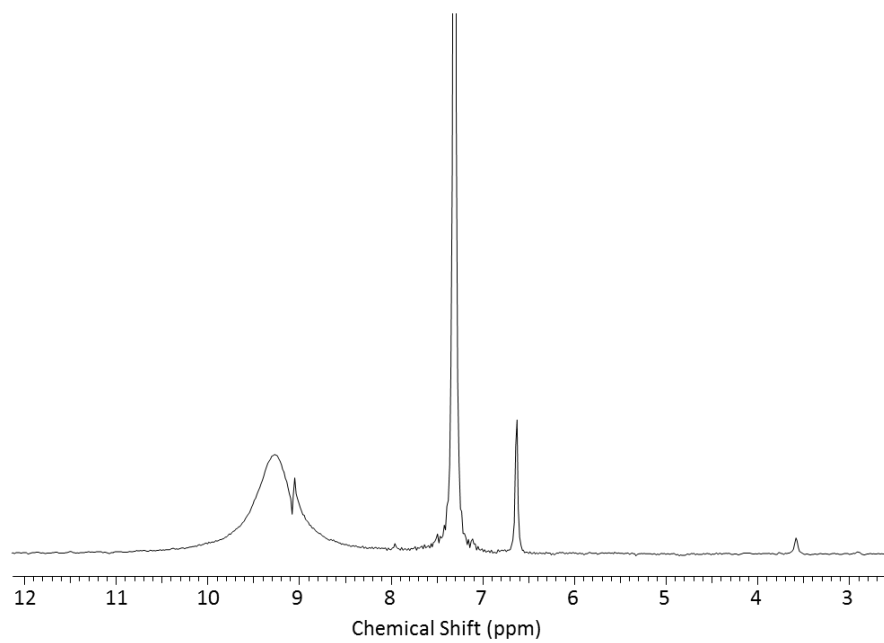

**Figure S16.** <sup>2</sup>H NMR spectrum of **12** in THF containing C<sub>6</sub>D<sub>6</sub> for Evans' method.

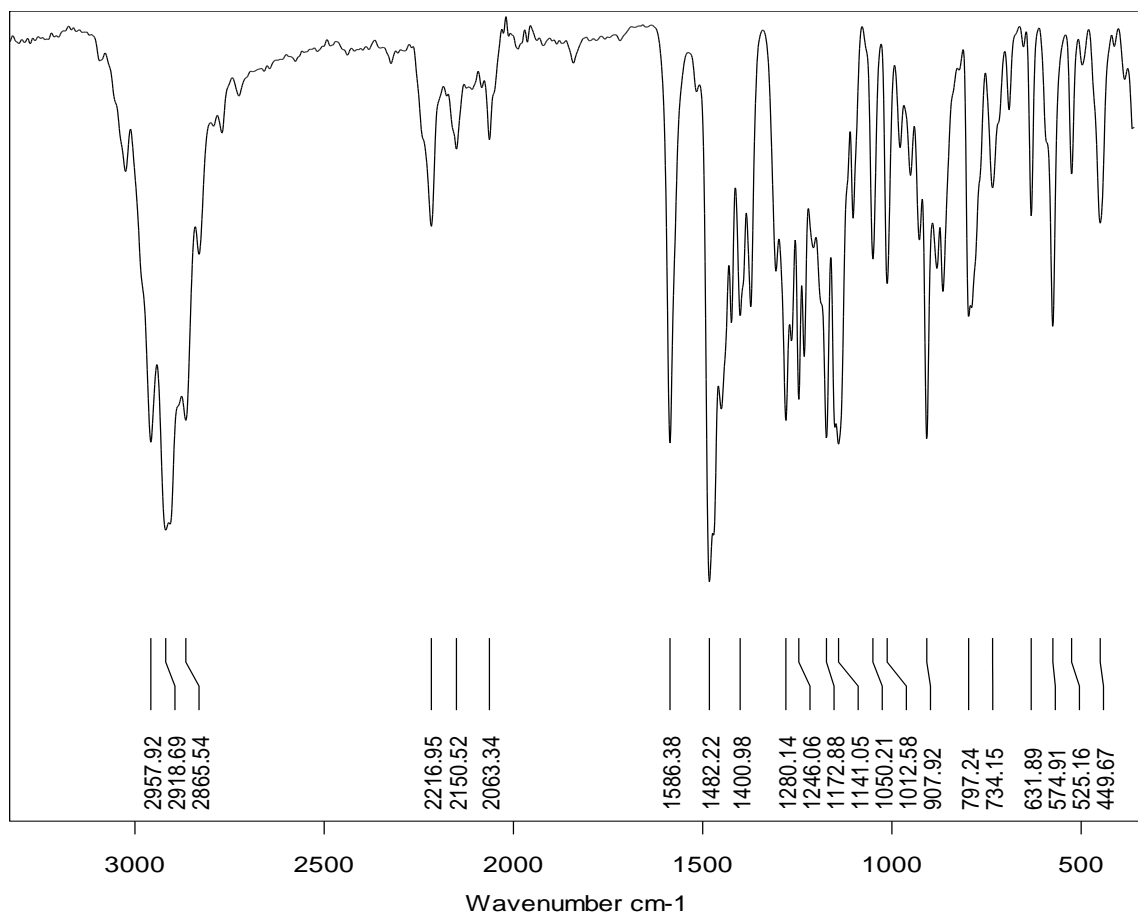

**Figure S17.** Diamond ATR-FTIR spectrum of **12**.

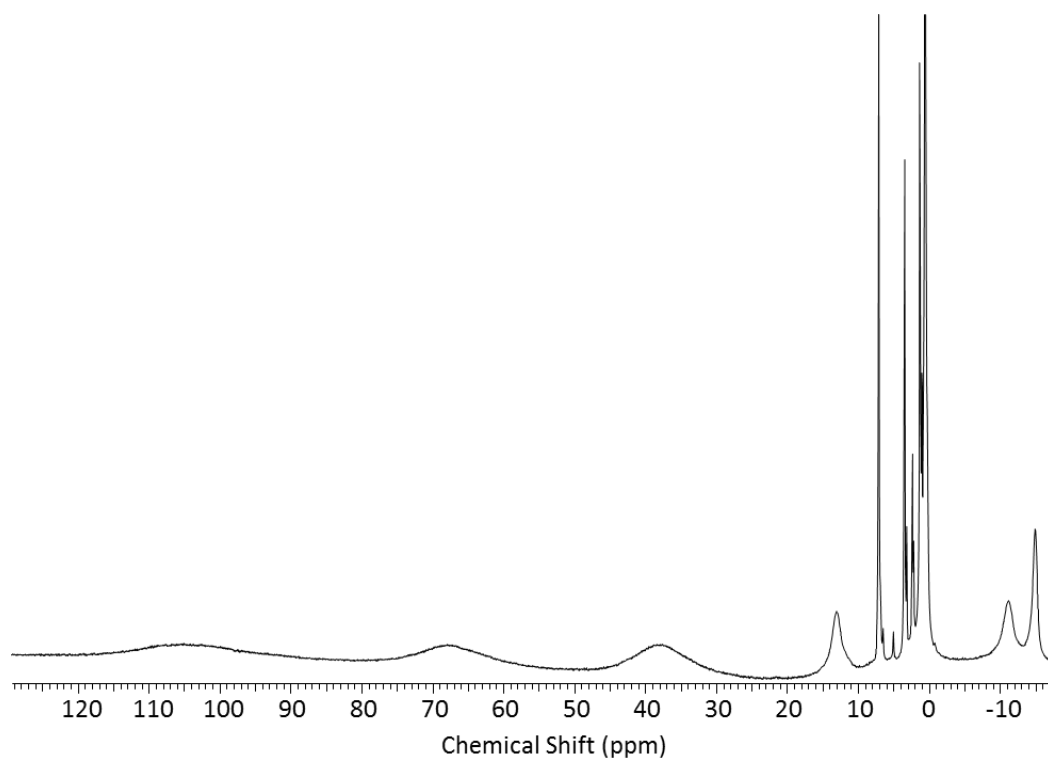

**Figure S18.**  $^1\text{H}$  NMR spectrum of **13** in  $\text{C}_6\text{D}_6$ .

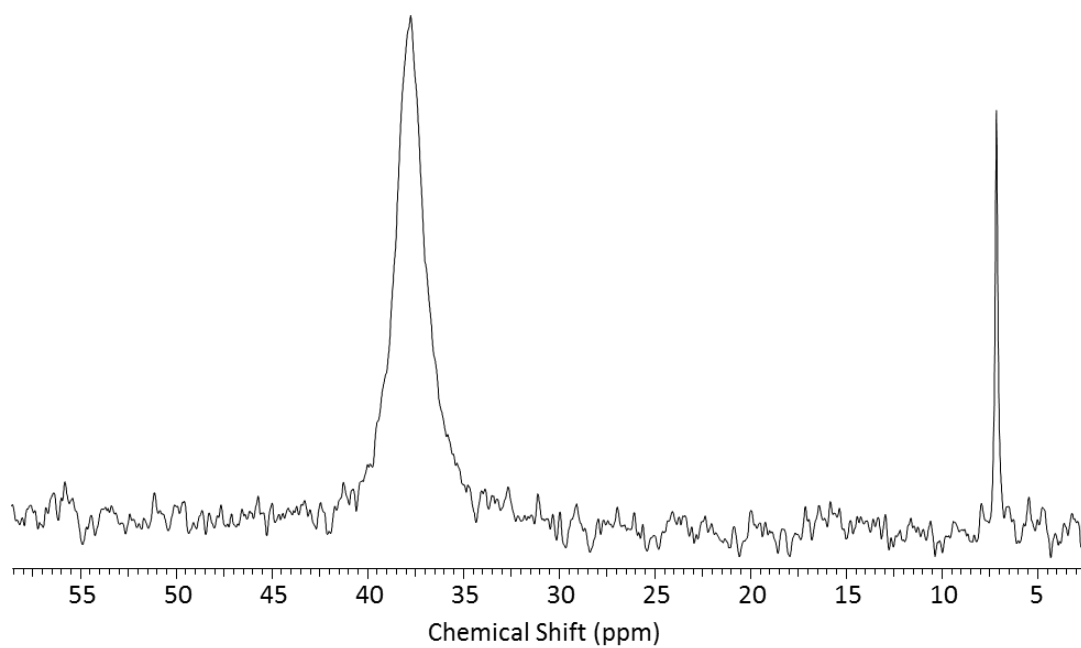

**Figure S19.**  $^2\text{H}$  NMR spectrum of **13** in  $\text{C}_6\text{H}_6$ .



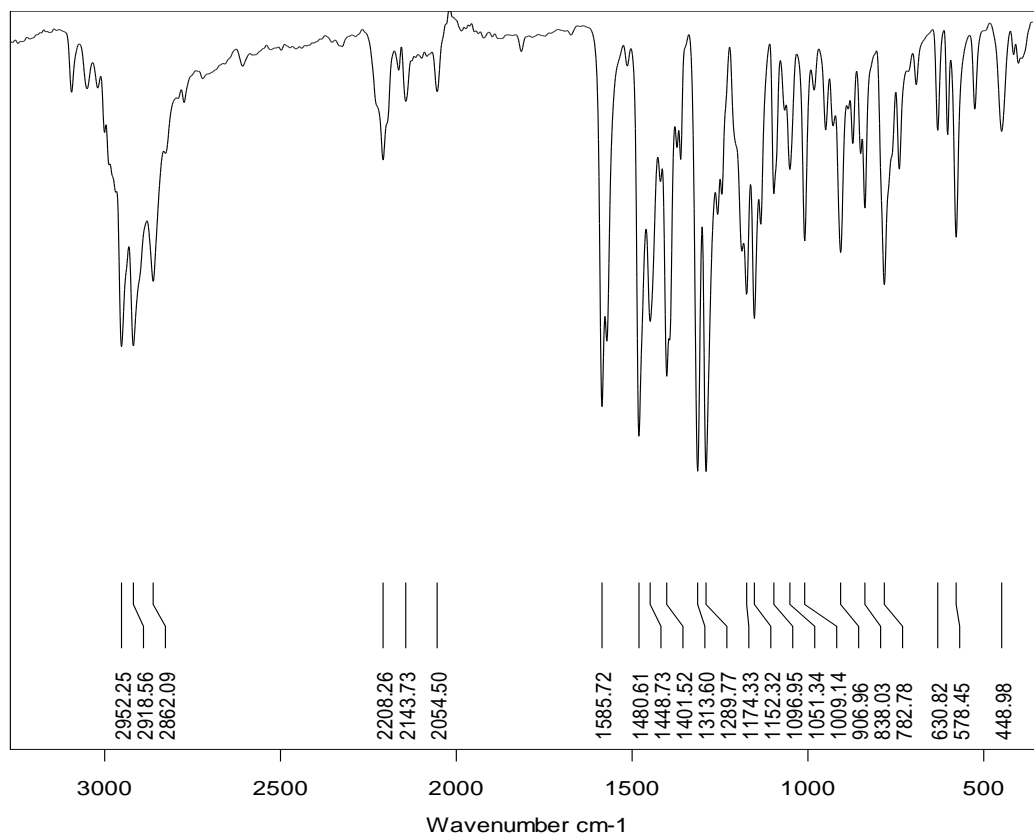

**Figure S20.** Diamond ATR-FTIR spectrum of **13**.

**Table S1.** Crystal data and refinement parameters for  $\alpha$ -5,  $\beta$ -5, 7 and 10.

| Compound                                              | $\alpha$ -5                                        | $\beta$ -5                                         | 7                                                                              | 10                                                               |
|-------------------------------------------------------|----------------------------------------------------|----------------------------------------------------|--------------------------------------------------------------------------------|------------------------------------------------------------------|
| Empirical formula                                     | C <sub>37</sub> H <sub>54</sub> MoN <sub>4</sub> O | C <sub>37</sub> H <sub>54</sub> MoN <sub>4</sub> O | C <sub>86</sub> H <sub>132</sub> Mo <sub>2</sub> N <sub>8</sub> O <sub>7</sub> | C <sub>26</sub> H <sub>42</sub> Cl <sub>2</sub> MoN <sub>4</sub> |
| CCDC No.                                              | 961017                                             | 961016                                             | 961022                                                                         | 961020                                                           |
| Temperature (K)                                       | 100                                                | 173                                                | 100                                                                            | 100                                                              |
| Crystal System                                        | Monoclinic                                         | Monoclinic                                         | Triclinic                                                                      | Triclinic                                                        |
| Space group                                           | P2 <sub>1</sub> /c                                 | P2 <sub>1</sub> /c                                 | P $\bar{1}$                                                                    | P $\bar{1}$                                                      |
| a (Å)                                                 | 11.274(2)                                          | 11.9028(8)                                         | 11.8143(6)                                                                     | 9.5016(8)                                                        |
| b (Å)                                                 | 11.269(2)                                          | 10.6135(8)                                         | 11.9134(6)                                                                     | 10.2855(9)                                                       |
| c (Å)                                                 | 28.865(4)                                          | 29.811(2)                                          | 16.8751(9)                                                                     | 15.796(1)                                                        |
| $\alpha$ (°)                                          | 90                                                 | 90                                                 | 79.050(1)                                                                      | 91.198(2)                                                        |
| $\beta$ (°)                                           | 95.380(2)                                          | 93.675(1)                                          | 86.767(1)                                                                      | 105.138(1)                                                       |
| $\gamma$ (°)                                          | 90                                                 | 90                                                 | 65.461(1)                                                                      | 115.939(1)                                                       |
| Volume (Å <sup>3</sup> )                              | 3650.7(9)                                          | 3758.3(5)                                          | 2120.6(2)                                                                      | 1323.7(2)                                                        |
| Z, $\rho$ (g/cm <sup>3</sup> )                        | 4, 1.213                                           | 4, 1.178                                           | 1, 1.238                                                                       | 2, 1.449                                                         |
| $\mu$ (mm <sup>-1</sup> )                             | 0.39                                               | 0.38                                               | 0.35                                                                           | 0.72                                                             |
| $\theta$ (°)                                          | 1.42 – 30.51                                       | 1.37 – 27.76                                       | 1.23 – 29.13                                                                   | 1.35 – 27.10                                                     |
| limiting indices                                      | -16 ≤ h ≤ 16<br>-16 ≤ k ≤ 16<br>-41 ≤ l ≤ 40       | -15 ≤ h ≤ 15<br>-13 ≤ k ≤ 13<br>-38 ≤ l ≤ 39       | -16 ≤ h ≤ 16<br>-15 ≤ k ≤ 16<br>-23 ≤ l ≤ 23                                   | -12 ≤ h ≤ 12<br>-13 ≤ k ≤ 13<br>-20 ≤ l ≤ 19                     |
| refl collec./unique                                   | 91196 / 11074                                      | 72770 / 8837                                       | 45521/11340                                                                    | 25509 / 5835                                                     |
| R(int)                                                | 0.08                                               | 0.06                                               | 0.03                                                                           | 0.056                                                            |
| no. of parameters                                     | 403                                                | 394                                                | 522                                                                            | 310                                                              |
| $R1^a/wR2^a$ ( $I > 2\sigma(I)$ )                     | 0.0920 / 0.1939                                    | 0.0395 / 0.0888                                    | 0.0361 / 0.0908                                                                | 0.0371 / 0.0833                                                  |
| $R1^a/wR2^a$ for all data                             | 0.1354 / 0.2147                                    | 0.0623 / 0.0994                                    | 0.0419 / 0.0958                                                                | 0.0510 / 0.0909                                                  |
| goodness-of-fit on $F^2$                              | 1.280                                              | 1.09                                               | 1.06                                                                           | 1.04                                                             |
| larg diff peak/hole (e <sup>-</sup> Å <sup>-3</sup> ) | 1.441 / -1.130                                     | 0.386 / -0.325                                     | 0.973 / -0.896                                                                 | 0.501 / -0.652                                                   |

$$^a R1 = \sum |F_o| - |F_c| / \sum |F_o|; wR2 = \{ \sum [w(F_o^2 - F_c^2)^2] / \sum w(F_o^2)^2 \}^{1/2}.$$

**Table S2.** Crystal data and refinement parameters for **11**, **12**, **13** and **14**.

| Compound                                 | <b>11</b>                                        | <b>12</b>                                          | <b>13</b>                                                         | <b>14</b>                                          |
|------------------------------------------|--------------------------------------------------|----------------------------------------------------|-------------------------------------------------------------------|----------------------------------------------------|
| Empirical formula                        | C <sub>26</sub> H <sub>42</sub> MoN <sub>8</sub> | C <sub>26</sub> H <sub>42</sub> ClN <sub>4</sub> V | C <sub>39</sub> H <sub>66</sub> ClN <sub>6</sub> V <sub>1.5</sub> | C <sub>62</sub> H <sub>96</sub> MoN <sub>9</sub> V |
| CCDC No.                                 | 961021                                           | 961018                                             | 961019                                                            | 961023                                             |
| Temperature (K)                          | 100                                              | 100                                                | 100                                                               | 100                                                |
| Crystal System                           | Monoclinic                                       | Monoclinic                                         | Monoclinic                                                        | Triclinic                                          |
| Space group                              | P2 <sub>1</sub> /n                               | P2 <sub>1</sub> /n                                 | P2 <sub>1</sub> /c                                                | P $\bar{1}$                                        |
| a (Å)                                    | 9.3180(6)                                        | 9.328(2)                                           | 17.631(2)                                                         | 10.491(1)                                          |
| b (Å)                                    | 18.593(1)                                        | 33.209(6)                                          | 9.686(1)                                                          | 10.876(2)                                          |
| c (Å)                                    | 16.049(1)                                        | 17.787(4)                                          | 24.542(3)                                                         | 28.605(4)                                          |
| $\alpha$ (°)                             | 90.00                                            | 90.00                                              | 90.00                                                             | 88.905(4)                                          |
| $\beta$ (°)                              | 101.961(1)                                       | 103.715(3)                                         | 103.421(2)                                                        | 85.552(4)                                          |
| $\gamma$ (°)                             | 90.00                                            | 90.00                                              | 90.00                                                             | 68.327(3)                                          |
| Volume (Å <sup>3</sup> )                 | 2720.1(3)                                        | 5353(2)                                            | 4076.8(8)                                                         | 3023.7(7)                                          |
| Z, $\rho$ (g/cm <sup>3</sup> )           | 4, 1.374                                         | 8, 1.233                                           | 4, 1.191                                                          | 2, 1.224                                           |
| $\mu$ (mm <sup>-1</sup> )                | 0.512                                            | 0.49                                               | 0.45                                                              | 0.41                                               |
| $\theta$ (°)                             | 1.70 – 30.52                                     | 1.23 – 28.70                                       | 1.19 – 30.49                                                      | 0.71 – 24.78                                       |
| limiting indices                         | -13 ≤ h ≤ 13<br>-26 ≤ k ≤ 26<br>-22 ≤ l ≤ 22     | -11 ≤ h ≤ 12<br>-44 ≤ k ≤ 44<br>-24 ≤ l ≤ 24       | -25 ≤ h ≤ 25<br>-13 ≤ k ≤ 13<br>-34 ≤ l ≤ 33                      | -12 ≤ h ≤ 12<br>-12 ≤ k ≤ 12<br>0 ≤ l ≤ 33         |
| refl collec./unique                      | 76191 / 8311                                     | 100488 / 13814                                     | 24332/12330                                                       | N/A / 10542                                        |
| R(int)                                   | 0.05                                             | 0.11                                               | 0.02                                                              | N/A                                                |
| no. of parameters                        | 328                                              | 601                                                | 612                                                               | 841                                                |
| $R1^a/wR2^a$ ( $I > 2\sigma(I)$ )        | 0.0280 / 0.0998                                  | 0.0801 / 0.1632                                    | 0.0432 / 0.1096                                                   | 0.0551 / 0.1175                                    |
| $R1^a/wR2^a$ for all data                | 0.0364 / 0.135                                   | 0.1283 / 0.1842                                    | 0.0618 / 0.1280                                                   | 0.0722 / 0.1258                                    |
| goodness-of-fit on $F^2$                 | 0.918                                            | 1.11                                               | 0.795                                                             | 1.141                                              |
| larg diff peak/hole (e·Å <sup>-3</sup> ) | 0.763 / -0.723                                   | 0.776 / -0.713                                     | 0.403 / -0.361                                                    | 0.684 / -0.714                                     |

$$^aR1 = \sum ||F_o| - |F_c|| / \sum |F_o|; wR2 = \{ \sum [w(F_o^2 - F_c^2)^2] / \sum w(F_o^2)^2 \}^{1/2}.$$

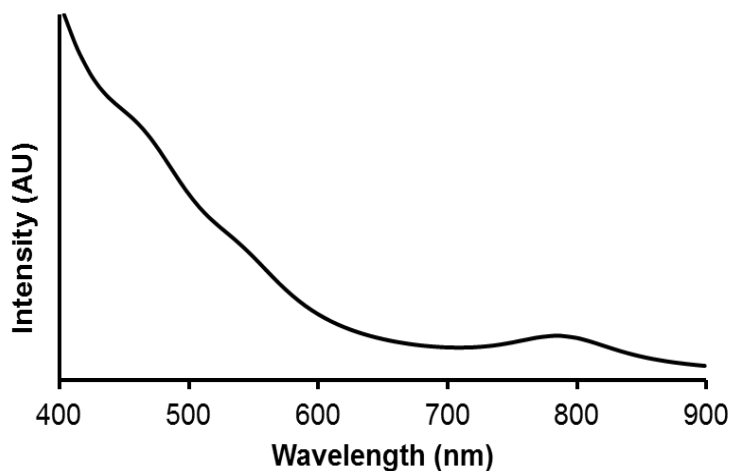

**Figure S21.** DFT modeled UV/VIS absorption spectrum of **5** with a Laurentian broadening of 50 applied to first 100 roots.

**Table S3.** Cartesian coordinates for DFT optimized  $(\text{CH}_3)_4\text{Si}$ .

| Atom | x        | y        | z        |
|------|----------|----------|----------|
| H    | 0.3087   | 1.378474 | -2.08742 |
| H    | -1.22362 | 1.786446 | -1.29435 |
| H    | -0.46064 | -1.69981 | -1.80306 |
| H    | -1.95762 | -1.2663  | -0.95362 |
| C    | -0.16959 | 1.535615 | -1.10998 |
| H    | 2.309418 | -0.71203 | -0.71787 |
| C    | -0.88691 | -1.47317 | -0.81562 |
| H    | 0.306768 | 2.412778 | -0.64943 |
| Si   | -0.00036 | -0.00018 | -0.00295 |
| H    | -0.80284 | -2.38165 | -0.20258 |
| C    | 1.838505 | -0.4205  | 0.232329 |
| H    | 2.39781  | 0.439324 | 0.627967 |
| H    | 1.973852 | -1.25141 | 0.939716 |
| C    | -0.78527 | 0.357198 | 1.690935 |
| H    | -1.84843 | 0.618676 | 1.594502 |
| H    | -0.28093 | 1.192999 | 2.196354 |
| H    | -0.71885 | -0.51646 | 2.35506  |

**Table S4.** Cartesian coordinates for DFT optimized **5** (S = 1).

| Atom | x        | y        | z        |
|------|----------|----------|----------|
| C    | -2.77181 | 0.681616 | -1.41797 |
| C    | 0.266801 | -1.88295 | 2.044737 |
| C    | 0.174317 | -3.2391  | 1.670872 |
| C    | 1.108402 | -4.16973 | 2.117506 |
| C    | 2.176679 | -3.76528 | 2.92559  |
| C    | 2.291337 | -2.42365 | 3.289517 |
| C    | 1.344241 | -1.49247 | 2.859864 |
| C    | -2.03121 | -0.89604 | 2.312056 |
| C    | -3.04036 | -1.79414 | 1.57786  |
| C    | -1.88113 | -1.37437 | 3.764455 |
| C    | -2.54609 | 0.548161 | 2.334498 |
| C    | 2.236694 | -1.01468 | -1.33229 |
| C    | 2.960938 | -1.81132 | -0.4277  |
| C    | 4.350433 | -1.71142 | -0.33924 |
| C    | 5.047265 | -0.82417 | -1.15965 |
| C    | 4.340939 | -0.02689 | -2.06695 |
| C    | 2.953267 | -0.11012 | -2.14222 |
| C    | 0.234325 | -1.89248 | -2.57608 |
| C    | -1.05037 | -2.58844 | -2.11093 |
| C    | -0.08342 | -0.94148 | -3.74136 |
| C    | 1.219388 | -2.97257 | -3.05011 |
| C    | 1.568289 | 1.847909 | 1.389653 |
| C    | 1.093595 | 2.263442 | 2.650519 |
| C    | 1.936999 | 2.294257 | 3.757675 |
| C    | 3.269149 | 1.882485 | 3.641545 |
| C    | 3.748359 | 1.451891 | 2.404517 |
| C    | 2.910186 | 1.439969 | 1.288175 |
| C    | 0.421795 | 3.145066 | -0.4353  |
| C    | -0.86928 | 3.759061 | 0.129972 |
| C    | 1.587528 | 4.125816 | -0.23428 |
| C    | 0.259018 | 2.897234 | -1.9397  |
| N    | -1.71648 | 0.44013  | -0.88944 |
| N    | -0.69527 | -0.91605 | 1.61394  |
| N    | 0.813248 | -1.12993 | -1.41114 |
| N    | 0.722386 | 1.829364 | 0.236396 |
| O    | -3.81672 | 0.924294 | -1.94294 |
| Mo   | 0.000000 | 0.00000  | 0.000000 |
| H    | -0.64562 | -3.55222 | 1.026422 |
| H    | 1.010375 | -5.21618 | 1.825143 |

|   |          |          |          |
|---|----------|----------|----------|
| H | 2.910585 | -4.49474 | 3.269481 |
| H | 3.116696 | -2.09522 | 3.922373 |
| H | 1.415246 | -0.45307 | 3.176331 |
| H | -3.15488 | -1.47651 | 0.535065 |
| H | -4.02543 | -1.74156 | 2.063288 |
| H | -2.72027 | -2.84399 | 1.588436 |
| H | -1.15658 | -0.75835 | 4.313061 |
| H | -1.55569 | -2.42013 | 3.824396 |
| H | -2.85086 | -1.29424 | 4.273546 |
| H | -1.84022 | 1.198135 | 2.866449 |
| H | -3.51354 | 0.592752 | 2.853064 |
| H | -2.68648 | 0.944599 | 1.324219 |
| H | 2.423037 | -2.53104 | 0.187406 |
| H | 4.888991 | -2.34146 | 0.36983  |
| H | 6.133629 | -0.75311 | -1.09769 |
| H | 4.875842 | 0.672128 | -2.71148 |
| H | 2.402953 | 0.524956 | -2.83501 |
| H | -0.83392 | -3.27874 | -1.28618 |
| H | -1.48478 | -3.16568 | -2.93854 |
| H | -1.80143 | -1.86896 | -1.771   |
| H | 0.827942 | -0.46601 | -4.12669 |
| H | -0.77702 | -0.15551 | -3.42143 |
| H | -0.54806 | -1.49218 | -4.57189 |
| H | 2.150407 | -2.54236 | -3.43873 |
| H | 0.755169 | -3.55446 | -3.8577  |
| H | 1.474641 | -3.66374 | -2.2363  |
| H | 0.05185  | 2.565441 | 2.746842 |
| H | 1.551364 | 2.630551 | 4.721228 |
| H | 3.926439 | 1.901408 | 4.511443 |
| H | 4.785706 | 1.131706 | 2.299056 |
| H | 3.296593 | 1.137596 | 0.316154 |
| H | -1.71244 | 3.070051 | 0.004273 |
| H | -1.11046 | 4.695816 | -0.39284 |
| H | -0.76559 | 3.991707 | 1.197629 |
| H | 2.528174 | 3.709435 | -0.61786 |
| H | 1.733428 | 4.385073 | 0.821446 |
| H | 1.376903 | 5.053684 | -0.78261 |
| H | 1.177267 | 2.466974 | -2.35874 |
| H | 0.056464 | 3.845683 | -2.45574 |
| H | -0.57009 | 2.214609 | -2.15043 |

**Table S5.** Cartesian coordinates for DFT optimized CO.

| Atom | x     | y     | Z         |
|------|-------|-------|-----------|
| C    | 0.000 | 0.000 | -0.568397 |
| O    | 0.000 | 0.000 | 0.568397  |

**Table S6.** Cartesian coordinates for DFT optimized **1-mod** (S = 0) constrained to have the same coordination geometry as **1**.

| Atom | x        | y        | z        |
|------|----------|----------|----------|
| Mo   | -0.00907 | 0.001629 | 0.019748 |
| N    | 1.630391 | 0.001017 | 0.017324 |
| N    | -0.42638 | 1.936439 | 0.006396 |
| N    | -0.43127 | -0.95002 | -1.66456 |
| N    | -0.41841 | -0.98035 | 1.688929 |
| C    | 0.475713 | -1.74195 | -2.47711 |
| C    | -1.80738 | -1.05548 | -2.12731 |
| H    | 0.408945 | -1.45584 | -3.54349 |
| H    | 1.506482 | -1.59817 | -2.14068 |
| H    | 0.233811 | -2.8191  | -2.41055 |
| H    | -2.48579 | -0.45073 | -1.50639 |
| H    | -2.17246 | -2.09919 | -2.10285 |
| H    | -1.91016 | -0.69286 | -3.16664 |
| C    | 0.485431 | 3.02653  | -0.29361 |
| C    | -1.80408 | 2.393018 | 0.115946 |
| H    | 0.254499 | 3.479519 | -1.27587 |
| H    | 1.51575  | 2.660034 | -0.31711 |
| H    | 0.412336 | 3.829196 | 0.463696 |
| H    | -2.15713 | 2.865888 | -0.81954 |
| H    | -2.48456 | 1.558597 | 0.344813 |
| H    | -1.91846 | 3.135658 | 0.926643 |
| C    | 0.496734 | -1.28389 | 2.775148 |
| C    | -1.79258 | -1.33013 | 2.018105 |
| H    | 0.25966  | -0.68688 | 3.67526  |
| H    | 0.435924 | -2.35028 | 3.061936 |
| H    | 1.524503 | -1.06144 | 2.473763 |
| H    | -1.89348 | -2.41184 | 2.222555 |
| H    | -2.15436 | -0.78767 | 2.911354 |
| H    | -2.47444 | -1.09433 | 1.186604 |

**Table S7.** Cartesian coordinates for DFT optimized **5-mod** (S = 1), constrained to have the same coordination geometry as **5**.

| Atom | x        | y        | z        |
|------|----------|----------|----------|
| Mo   | -0.00228 | 0.002636 | 0.002714 |
| N    | 1.958494 | 0.001478 | 0.003244 |
| N    | -0.41541 | 1.920208 | 0.004283 |
| N    | -0.41782 | -0.95255 | -1.65938 |
| N    | -0.41106 | -0.95824 | 1.663431 |
| C    | 0.455101 | -1.75977 | -2.49462 |
| C    | -1.76306 | -0.82707 | -2.19505 |
| H    | 0.515848 | -1.3535  | -3.52162 |
| H    | 1.465746 | -1.7806  | -2.07404 |
| H    | 0.091957 | -2.80168 | -2.57002 |
| H    | -2.37354 | -0.14959 | -1.5739  |
| H    | -2.28706 | -1.80034 | -2.23076 |
| H    | -1.75737 | -0.40612 | -3.21736 |
| C    | 0.458591 | 3.046228 | -0.27734 |
| C    | -1.75807 | 2.323561 | 0.388491 |
| H    | 0.0925   | 3.636226 | -1.13809 |
| H    | 1.467373 | 2.691361 | -0.51226 |
| H    | 0.525065 | 3.729346 | 0.590104 |
| H    | -2.28513 | 2.843116 | -0.43333 |
| H    | -2.3688  | 1.447802 | 0.666365 |
| H    | -1.74642 | 2.997335 | 1.265054 |
| C    | 0.464533 | -1.27718 | 2.778197 |
| C    | -1.75453 | -1.48917 | 1.824358 |
| H    | 0.102328 | -0.82301 | 3.719278 |
| H    | 0.527816 | -2.36969 | 2.939104 |
| H    | 1.474229 | -0.90045 | 2.584788 |
| H    | -1.74518 | -2.58501 | 1.970553 |
| H    | -2.27875 | -1.03527 | 2.685882 |
| H    | -2.36687 | -1.29155 | 0.928018 |
| C    | 3.163986 | 0.015062 | 0.022974 |
| O    | 4.35758  | 0.026245 | 0.039321 |



**Table S8.** Cartesian coordinates for DFT optimized intermediate in reaction of CO with **1-mod** on path to **5-mod** ( $S = 0$ ) where CO binds to metal.

| Atom | x        | y        | z        |
|------|----------|----------|----------|
| N    | 1.834463 | -0.46383 | -0.6231  |
| Mo   | 0.250807 | -0.03506 | -0.43495 |
| N    | -0.42732 | -0.92334 | 1.285953 |
| N    | -0.64257 | -1.22883 | -1.75207 |
| N    | 0.082294 | 1.720767 | -1.42613 |
| C    | 0.354763 | -1.77145 | 2.16289  |
| C    | -1.69145 | -0.5469  | 1.882794 |
| C    | 0.027453 | -2.01879 | -2.76584 |
| C    | -2.07998 | -1.39682 | -1.80279 |
| C    | 1.160996 | 2.625782 | -1.76572 |
| C    | -1.2181  | 2.304993 | -1.68403 |
| H    | 1.316561 | -2.01539 | 1.702351 |
| H    | 0.5451   | -1.29149 | 3.144381 |
| H    | -0.17826 | -2.71912 | 2.367548 |
| H    | -1.5594  | -0.00843 | 2.843612 |
| H    | -2.27174 | 0.111294 | 1.217823 |
| H    | -2.31807 | -1.43354 | 2.092625 |
| H    | -0.25099 | -3.08723 | -2.69015 |
| H    | 1.113144 | -1.9336  | -2.65969 |
| H    | -0.24742 | -1.68391 | -3.78465 |
| H    | -2.3671  | -2.45623 | -1.66136 |
| H    | -2.58313 | -0.81848 | -1.01474 |
| H    | -2.50006 | -1.07184 | -2.77377 |
| H    | 2.130171 | 2.144133 | -1.60586 |
| H    | 1.096942 | 2.927714 | -2.82831 |
| H    | 1.130928 | 3.558365 | -1.16627 |
| H    | -1.39298 | 3.231015 | -1.10135 |
| H    | -1.3282  | 2.570362 | -2.75307 |
| H    | -2.02904 | 1.602156 | -1.44372 |
| C    | 0.756345 | 1.33885  | 1.25004  |
| O    | 0.778497 | 1.964513 | 2.211408 |

**Table S9.** Cartesian coordinates for DFT optimized **1**

| Atom | x        | y        | z        |
|------|----------|----------|----------|
| H    | -1.68157 | -1.3873  | -4.89829 |
| H    | -0.04948 | -1.78734 | -4.3206  |
| H    | -1.49501 | 0.900894 | -4.11882 |
| C    | -1.11056 | -1.76502 | -4.03985 |
| H    | -1.43483 | -2.79465 | -3.84777 |
| H    | 4.299629 | -0.64182 | -3.64674 |
| H    | 0.138364 | 0.616446 | -3.47107 |
| C    | -0.93237 | 0.580982 | -3.23083 |
| H    | -3.44356 | -0.47493 | -3.30404 |
| C    | -1.34917 | -0.84194 | -2.83458 |
| H    | 2.464035 | 0.665526 | -2.61326 |
| C    | 4.075573 | -0.76691 | -2.58629 |
| H    | -1.13372 | 1.293494 | -2.42459 |
| C    | -2.84015 | -0.84772 | -2.46389 |
| H    | 5.600557 | -2.26903 | -2.27448 |
| H    | 1.852485 | -2.4031  | -2.25527 |
| H    | -3.19147 | -1.85996 | -2.22653 |
| C    | 3.04926  | -0.0241  | -2.00662 |
| H    | 2.433571 | -4.81017 | -2.12735 |
| C    | 1.110154 | -3.12538 | -1.92089 |
| C    | 4.802182 | -1.68238 | -1.81881 |
| H    | 2.150284 | 2.735907 | -1.84146 |
| C    | 1.427484 | -4.48353 | -1.86107 |
| N    | -0.49915 | -1.28068 | -1.66239 |
| H    | -3.02001 | -0.19874 | -1.59829 |
| C    | -0.1743  | -2.67248 | -1.58264 |
| C    | 0.466083 | -5.41779 | -1.47569 |
| H    | 0.712057 | -6.47953 | -1.43855 |
| C    | -1.12877 | -3.62286 | -1.17181 |
| C    | -0.81703 | -4.98021 | -1.13338 |
| H    | -2.11942 | -3.28099 | -0.87535 |
| H    | 0.5269   | 2.854522 | -1.1103  |
| C    | 1.600484 | 2.9765   | -0.92255 |
| H    | -1.5754  | -5.69934 | -0.82025 |
| C    | 2.744327 | -0.15584 | -0.63814 |
| H    | 1.790607 | 4.033955 | -0.68906 |
| H    | 4.146011 | 2.013706 | -0.39842 |
| C    | 4.493854 | -1.83921 | -0.46756 |
| N    | -1.14328 | 0.984539 | -0.00129 |

|    |          |          |          |
|----|----------|----------|----------|
| N  | 1.717669 | 0.632446 | -0.02678 |
| Mo | -0.06152 | -0.26952 | 0.000638 |
| C  | 3.480299 | -1.07975 | 0.119573 |
| H  | 5.049986 | -2.55213 | 0.142558 |
| C  | 2.042486 | 2.084415 | 0.247782 |
| C  | 3.550437 | 2.25572  | 0.48981  |
| H  | 3.753723 | 3.301395 | 0.756293 |
| H  | -2.96101 | -0.27887 | 1.033602 |
| H  | 0.300978 | -3.72878 | 1.083752 |
| H  | -2.9732  | -2.05779 | 1.125054 |
| H  | 3.895782 | 1.620982 | 1.316434 |
| H  | 3.266418 | -1.17937 | 1.182088 |
| H  | 0.215828 | 2.467316 | 1.383998 |
| C  | 1.300833 | 2.516361 | 1.520064 |
| C  | -2.9342  | -1.13373 | 1.716851 |
| N  | -0.4642  | -1.24288 | 1.695223 |
| C  | 0.95395  | -3.2512  | 1.811885 |
| H  | 2.248808 | -4.96032 | 1.998452 |
| H  | 1.56767  | 3.551667 | 1.77377  |
| C  | 0.663927 | -1.94329 | 2.229655 |
| C  | 2.043185 | -3.94552 | 2.341495 |
| H  | -3.8309  | -1.0936  | 2.350698 |
| H  | 1.577889 | 1.873141 | 2.365448 |
| H  | -1.57213 | 1.064029 | 2.688115 |
| C  | -1.67441 | -1.10747 | 2.593109 |
| H  | -1.76735 | -3.24865 | 3.0383   |
| C  | 1.505972 | -1.34878 | 3.189108 |
| C  | 2.856    | -3.35405 | 3.308494 |
| C  | -1.63155 | 0.213112 | 3.37744  |
| H  | 1.311024 | -0.32293 | 3.498665 |
| H  | 3.700878 | -3.90056 | 3.728855 |
| C  | -1.74646 | -2.28966 | 3.572399 |
| C  | 2.579572 | -2.05074 | 3.732791 |
| H  | -2.54112 | 0.325914 | 3.984729 |
| H  | -0.77144 | 0.248279 | 4.058444 |
| H  | -2.66856 | -2.20934 | 4.16308  |
| H  | -0.90086 | -2.30569 | 4.27036  |
| H  | 3.213382 | -1.57253 | 4.481123 |

**Table S10.** Cartesian coordinates for DFT optimized **9** ( $S = 0$ ).

| Atom | x         | y        | z        |
|------|-----------|----------|----------|
| C    | -0.4418   | -1.62866 | 1.724096 |
| C    | -0.48329  | -2.99223 | 1.367153 |
| C    | 0.431817  | -3.90828 | 1.886958 |
| C    | 1.423356  | -3.44368 | 2.749333 |
| C    | 1.517016  | -2.10348 | 3.107462 |
| C    | 0.579665  | -1.20409 | 2.591892 |
| C    | -2.79077  | -0.7491  | 1.879282 |
| C    | -3.73247  | -1.67601 | 1.090528 |
| C    | -2.67989  | -1.23915 | 3.334455 |
| C    | -3.37318  | 0.673064 | 1.894496 |
| C    | 1.49486   | -0.90541 | -1.67484 |
| C    | 2.185317  | -1.76265 | -0.80014 |
| C    | 3.580096  | -1.74374 | -0.71307 |
| C    | 4.287291  | -0.85719 | -1.5176  |
| C    | 3.644818  | 0.012963 | -2.39669 |
| C    | 2.250954  | -0.00666 | -2.45532 |
| C    | -0.5116   | -1.64845 | -2.99545 |
| C    | -1.83178  | -2.32525 | -2.59372 |
| C    | -0.78265  | -0.63264 | -4.11907 |
| C    | 0.453619  | -2.73634 | -3.5002  |
| C    | 0.900737  | 2.02769  | 0.946605 |
| C    | 0.468413  | 2.423845 | 2.229229 |
| C    | 1.354382  | 2.499179 | 3.304402 |
| C    | 2.68495   | 2.138561 | 3.098613 |
| C    | 3.148638  | 1.719304 | 1.85682  |
| C    | 2.250731  | 1.669226 | 0.786854 |
| C    | -0.37088  | 3.343245 | -0.77691 |
| C    | -1.66487  | 3.889817 | -0.14805 |
| C    | 0.771265  | 4.356046 | -0.57691 |
| C    | -0.58311  | 3.150927 | -2.28703 |
| N    | -2.29961  | 0.59014  | -1.19238 |
| N    | -1.41683  | -0.69978 | 1.232057 |
| N    | 0.065468  | -0.95718 | -1.77212 |
| N    | 0.000394  | 2.001219 | -0.16887 |
| Mo   | -0.863122 | 0.221087 | -0.45262 |
| H    | -1.24925  | -3.33357 | 0.670572 |
| H    | 0.393473  | -4.96579 | 1.621167 |
| H    | 2.306988  | -1.7739  | 3.783432 |
| H    | 0.616718  | -0.15652 | 2.889661 |

|   |          |          |          |
|---|----------|----------|----------|
| H | -3.81689 | -1.33882 | 0.048858 |
| H | -4.73877 | -1.66836 | 1.537259 |
| H | -3.37431 | -2.71535 | 1.099033 |
| H | -2.00196 | -0.60298 | 3.921554 |
| H | -2.32195 | -2.27505 | 3.402589 |
| H | -3.67385 | -1.19719 | 3.8027   |
| H | -2.70519 | 1.358867 | 2.435419 |
| H | -4.34897 | 0.672765 | 2.403171 |
| H | -3.5192  | 1.054723 | 0.877237 |
| H | 1.617229 | -2.47442 | -0.20176 |
| H | 4.1151   | -2.41032 | -0.03541 |
| H | 4.231428 | 0.700857 | -3.00756 |
| H | 1.730646 | 0.686951 | -3.11636 |
| H | -1.66671 | -3.04091 | -1.77546 |
| H | -2.24663 | -2.87538 | -3.45175 |
| H | -2.57526 | -1.58755 | -2.27012 |
| H | 0.147354 | -0.16313 | -4.47044 |
| H | -1.4653  | 0.152606 | -3.7677  |
| H | -1.24884 | -1.13173 | -4.98269 |
| H | 1.404151 | -2.32024 | -3.85957 |
| H | -0.01602 | -3.2705  | -4.33885 |
| H | 0.676713 | -3.47106 | -2.7132  |
| H | -0.58151 | 2.676046 | 2.379297 |
| H | 1.02336  | 2.816295 | 4.29456  |
| H | 4.196474 | 1.443617 | 1.731017 |
| H | 2.605255 | 1.377288 | -0.20138 |
| H | -2.48654 | 3.173318 | -0.28005 |
| H | -1.9541  | 4.836698 | -0.62979 |
| H | -1.53784 | 4.090119 | 0.925387 |
| H | 1.714331 | 3.986427 | -1.00465 |
| H | 0.944189 | 4.590225 | 0.481854 |
| H | 0.511535 | 5.293799 | -1.08902 |
| H | 0.323223 | 2.741478 | -2.75621 |
| H | -0.80619 | 4.119131 | -2.76013 |
| H | -1.42029 | 2.47231  | -2.48846 |
| F | 3.553577 | 2.197445 | 4.147615 |
| F | 2.327555 | -4.3307  | 3.253084 |
| F | 5.648354 | -0.83382 | -1.44417 |

**Table S11.** Cartesian coordinates for DFT optimized OCN–Mo(N[R]Ar<sub>F</sub>)<sub>3</sub> (S = 1).

| Atom | x        | y        | z        |
|------|----------|----------|----------|
| C    | -3.41815 | 0.854454 | -1.7522  |
| C    | -0.36875 | -1.71601 | 1.722139 |
| C    | -0.44867 | -3.07397 | 1.343431 |
| C    | 0.473954 | -4.01231 | 1.803395 |
| C    | 1.512226 | -3.57971 | 2.628421 |
| C    | 1.642776 | -2.24928 | 3.011266 |
| C    | 0.698086 | -1.32587 | 2.555515 |
| C    | -2.67685 | -0.74148 | 1.985439 |
| C    | -3.67897 | -1.64522 | 1.243947 |
| C    | -2.52853 | -1.22458 | 3.439375 |
| C    | -3.19928 | 0.702274 | 2.010308 |
| C    | 1.598957 | -0.85662 | -1.66286 |
| C    | 2.324056 | -1.66979 | -0.76971 |
| C    | 3.716577 | -1.5947  | -0.68124 |
| C    | 4.388294 | -0.69551 | -1.50228 |
| C    | 3.71341  | 0.129778 | -2.40186 |
| C    | 2.322813 | 0.054232 | -2.4631  |
| C    | -0.40259 | -1.72871 | -2.91989 |
| C    | -1.69117 | -2.42676 | -2.46108 |
| C    | -0.71513 | -0.76995 | -4.08322 |
| C    | 0.585394 | -2.80881 | -3.39627 |
| C    | 0.938317 | 2.014933 | 1.054921 |
| C    | 0.468416 | 2.421644 | 2.322966 |
| C    | 1.314581 | 2.472296 | 3.429551 |
| C    | 2.643542 | 2.078231 | 3.273325 |
| C    | 3.145562 | 1.651174 | 2.048999 |
| C    | 2.287553 | 1.624552 | 0.946272 |
| C    | -0.21643 | 3.322034 | -0.76292 |
| C    | -1.50839 | 3.932243 | -0.18927 |
| C    | 0.950624 | 4.304902 | -0.55921 |
| C    | -0.38243 | 3.080624 | -2.27037 |
| N    | -2.36215 | 0.608821 | -1.22205 |
| N    | -1.3347  | -0.75263 | 1.285553 |
| N    | 0.173385 | -0.96664 | -1.74542 |
| N    | 0.085849 | 1.997328 | -0.09594 |
| O    | -4.46287 | 1.101121 | -2.27893 |
| Mo   | -0.64279 | 0.166054 | -0.33288 |
| H    | -1.25662 | -3.39119 | 0.684145 |
| H    | 0.405523 | -5.06472 | 1.523918 |

|   |          |          |          |
|---|----------|----------|----------|
| H | 2.463823 | -1.94739 | 3.662672 |
| H | 0.762422 | -0.28617 | 2.876483 |
| H | -3.79284 | -1.3245  | 0.200536 |
| H | -4.66751 | -1.60195 | 1.72694  |
| H | -3.35174 | -2.69479 | 1.251972 |
| H | -1.80696 | -0.60826 | 3.994734 |
| H | -2.20247 | -2.27179 | 3.49931  |
| H | -3.50149 | -1.14736 | 3.94629  |
| H | -2.49969 | 1.354176 | 2.551766 |
| H | -4.17221 | 0.741808 | 2.522249 |
| H | -3.33337 | 1.102612 | 0.999074 |
| H | 1.783823 | -2.39541 | -0.16155 |
| H | 4.2774   | -2.2297  | 0.005762 |
| H | 4.275745 | 0.823141 | -3.02908 |
| H | 1.777293 | 0.704286 | -3.1475  |
| H | -1.4769  | -3.12864 | -1.6432  |
| H | -2.12884 | -2.99487 | -3.2954  |
| H | -2.44072 | -1.70741 | -2.11298 |
| H | 0.199108 | -0.29022 | -4.46149 |
| H | -1.41251 | 0.014577 | -3.76303 |
| H | -1.17412 | -1.31676 | -4.92158 |
| H | 1.517367 | -2.37821 | -3.78664 |
| H | 0.120792 | -3.39065 | -4.20589 |
| H | 0.842087 | -3.50369 | -2.58388 |
| H | -0.57726 | 2.709862 | 2.430796 |
| H | 0.95718  | 2.800204 | 4.406882 |
| H | 4.192005 | 1.35613  | 1.961751 |
| H | 2.673245 | 1.329357 | -0.02956 |
| H | -2.35288 | 3.243059 | -0.31707 |
| H | -1.75225 | 4.874035 | -0.70516 |
| H | -1.4019  | 4.158909 | 0.881247 |
| H | 1.893703 | 3.892401 | -0.9456  |
| H | 1.097531 | 4.564149 | 0.497982 |
| H | 0.738069 | 5.235294 | -1.10579 |
| H | 0.539633 | 2.660485 | -2.69593 |
| H | -0.59479 | 4.030877 | -2.78251 |
| H | -1.20752 | 2.391105 | -2.48204 |
| F | 3.472215 | 2.117071 | 4.354058 |
| F | 2.422498 | -4.49076 | 3.072972 |
| F | 5.746564 | -0.6173  | -1.42981 |

**Table S12.** Cartesian coordinates for DFT optimized **4** ( $S = 0$ ).

| Atom | x        | y        | z        |
|------|----------|----------|----------|
| V    | 2.563164 | 3.623794 | 4.982403 |
| N    | 2.121533 | 5.611502 | 5.00128  |
| N    | 3.630051 | 3.702657 | 6.712449 |
| N    | 1.363325 | 2.227196 | 4.471119 |
| N    | 3.715391 | 3.58036  | 3.918513 |
| C    | 3.218202 | 7.82958  | 4.842709 |
| H    | 3.833273 | 7.887974 | 3.931679 |
| H    | 3.682459 | 8.478713 | 5.593825 |
| H    | 2.226863 | 8.219118 | 4.59495  |
| C    | 3.169482 | 6.39145  | 5.304527 |
| C    | 4.286325 | 5.928994 | 6.031032 |
| H    | 5.090406 | 6.657612 | 6.133165 |
| C    | 4.470073 | 4.745889 | 6.778323 |
| C    | 5.697346 | 4.683958 | 7.656662 |
| H    | 5.539264 | 4.06261  | 8.543629 |
| H    | 6.014959 | 5.684286 | 7.969978 |
| H    | 6.525334 | 4.23299  | 7.089567 |
| C    | 0.885444 | 6.1712   | 4.526013 |
| C    | -0.03358 | 6.718147 | 5.458982 |
| C    | -1.25549 | 7.205014 | 4.980695 |
| H    | -1.97044 | 7.633328 | 5.684542 |
| C    | -1.57667 | 7.159528 | 3.627796 |
| H    | -2.53694 | 7.54091  | 3.277937 |
| C    | -0.66064 | 6.632606 | 2.724204 |
| H    | -0.90783 | 6.612684 | 1.662125 |
| C    | 0.58209  | 6.13837  | 3.141431 |
| C    | 0.268547 | 6.823883 | 6.948543 |
| H    | 1.201533 | 6.277897 | 7.140738 |
| C    | 0.488667 | 8.286126 | 7.372303 |
| H    | 1.290616 | 8.76464  | 6.796728 |
| H    | 0.757957 | 8.341015 | 8.43681  |
| H    | -0.42452 | 8.880785 | 7.227809 |
| C    | -0.82706 | 6.18352  | 7.812113 |
| H    | -0.55289 | 6.241877 | 8.874747 |
| H    | -0.97909 | 5.128694 | 7.553661 |
| H    | -1.78937 | 6.701493 | 7.697926 |
| C    | 1.565241 | 5.641161 | 2.090403 |
| H    | 2.442299 | 5.228458 | 2.605804 |
| C    | 0.976133 | 4.51364  | 1.23128  |



|   |          |          |          |
|---|----------|----------|----------|
| H | 0.642875 | 3.668817 | 1.845743 |
| H | 1.73615  | 4.133932 | 0.53535  |
| H | 0.121017 | 4.858734 | 0.632182 |
| C | 2.049686 | 6.798765 | 1.201289 |
| H | 2.492397 | 7.611152 | 1.792928 |
| H | 1.224975 | 7.227816 | 0.614053 |
| H | 2.811348 | 6.440689 | 0.494857 |
| C | 3.73855  | 2.603635 | 7.635315 |
| C | 2.973361 | 2.632045 | 8.830529 |
| C | 3.079944 | 1.548469 | 9.709155 |
| H | 2.504225 | 1.550883 | 10.6342  |
| C | 3.89751  | 0.458373 | 9.422591 |
| H | 3.961003 | -0.37701 | 10.12127 |
| C | 4.627117 | 0.439013 | 8.240437 |
| H | 5.261493 | -0.41967 | 8.016706 |
| C | 4.571284 | 1.500177 | 7.326766 |
| C | 2.069454 | 3.809412 | 9.175654 |
| H | 1.730885 | 4.242124 | 8.222274 |
| C | 2.829589 | 4.908578 | 9.938272 |
| H | 3.661666 | 5.319363 | 9.355505 |
| H | 3.237171 | 4.516014 | 10.881   |
| H | 2.153911 | 5.740203 | 10.18483 |
| C | 0.822966 | 3.402197 | 9.97066  |
| H | 0.140662 | 4.257439 | 10.05831 |
| H | 1.072202 | 3.087066 | 10.99365 |
| H | 0.28013  | 2.585677 | 9.479835 |
| C | 5.400476 | 1.416177 | 6.052422 |
| H | 5.270824 | 2.351752 | 5.493028 |
| C | 6.898154 | 1.241684 | 6.349951 |
| H | 7.280549 | 2.02515  | 7.017516 |
| H | 7.474621 | 1.280957 | 5.415309 |
| H | 7.108992 | 0.272914 | 6.824759 |
| C | 4.90114  | 0.283452 | 5.142276 |
| H | 3.844431 | 0.41352  | 4.880183 |
| H | 5.015376 | -0.69898 | 5.622891 |
| H | 5.473639 | 0.268616 | 4.204729 |
| C | 1.319236 | 1.279886 | 3.416292 |
| C | 2.364645 | 1.198198 | 2.475312 |
| H | 3.208757 | 1.879271 | 2.577057 |
| C | 2.316821 | 0.279889 | 1.435167 |
| H | 3.147274 | 0.248466 | 0.725409 |
| C | 1.237482 | -0.6041  | 1.270609 |

|   |          |          |          |
|---|----------|----------|----------|
| C | 0.200116 | -0.51624 | 2.202564 |
| H | -0.66321 | -1.17919 | 2.109393 |
| C | 0.230852 | 0.400012 | 3.254712 |
| H | -0.60527 | 0.43143  | 3.950934 |
| C | 1.211926 | -1.60535 | 0.147087 |
| H | 0.229969 | -2.08807 | 0.063106 |
| H | 1.957865 | -2.40094 | 0.296989 |
| H | 1.438259 | -1.13471 | -0.82037 |
| C | 0.291933 | 2.152038 | 5.422694 |
| C | -0.84452 | 2.963355 | 5.291345 |
| C | -1.90051 | 2.851918 | 6.196375 |
| H | -2.77827 | 3.489118 | 6.070887 |
| C | -1.86289 | 1.929799 | 7.250253 |
| C | -0.72146 | 1.121946 | 7.373776 |
| H | -0.66606 | 0.390487 | 8.183031 |
| C | 0.341845 | 1.23031  | 6.481922 |
| C | -2.99502 | 1.825283 | 8.236353 |
| H | -3.93237 | 2.21087  | 7.816142 |
| H | -2.78271 | 2.405416 | 9.147793 |
| H | -3.16386 | 0.786404 | 8.54892  |
| H | -0.90232 | 3.667049 | 4.460267 |
| H | 1.216733 | 0.586955 | 6.582489 |

**Table S13.** Cartesian coordinates for DFT optimized OCN–V(nacnac)(N[*p*-tol]<sub>2</sub>) (S = 1).

| Atom | x        | y        | z        |
|------|----------|----------|----------|
| V    | -0.18912 | 0.187635 | -0.31593 |
| N    | -0.74783 | 1.209769 | -1.82848 |
| N    | -1.12119 | 0.647018 | 1.370969 |
| N    | -1.11705 | -1.54409 | -0.55247 |
| N    | 1.742186 | 0.116472 | -0.09267 |
| O    | -0.92388 | 2.588855 | -3.77976 |
| C    | -0.82272 | 1.906857 | -2.80882 |
| C    | -1.8131  | -0.24783 | 2.108411 |
| C    | -2.03985 | -1.56962 | 1.689612 |
| H    | -2.56878 | -2.19364 | 2.408781 |
| C    | -1.77066 | -2.17429 | 0.455313 |
| C    | -2.39857 | 0.129377 | 3.449348 |
| H    | -1.85675 | -0.38023 | 4.258312 |
| H    | -3.44466 | -0.19695 | 3.511144 |
| H    | -2.35575 | 1.20535  | 3.637905 |

|   |          |          |          |
|---|----------|----------|----------|
| C | -2.21287 | -3.60781 | 0.283309 |
| H | -2.9668  | -3.87735 | 1.030282 |
| H | -1.35284 | -4.28066 | 0.41546  |
| H | -2.61568 | -3.80518 | -0.71545 |
| C | 2.34134  | 1.168572 | -0.8494  |
| C | 2.038662 | 2.505926 | -0.54471 |
| H | 1.409859 | 2.730575 | 0.317362 |
| C | 2.513702 | 3.54659  | -1.34278 |
| H | 2.242055 | 4.573644 | -1.0912  |
| C | 3.335493 | 3.300717 | -2.44741 |
| C | 3.653285 | 1.963503 | -2.73533 |
| H | 4.279022 | 1.737315 | -3.60143 |
| C | 3.163141 | 0.916171 | -1.96343 |
| H | 3.405342 | -0.11254 | -2.22584 |
| C | 3.874977 | 4.425448 | -3.28863 |
| H | 3.231151 | 5.312141 | -3.23417 |
| H | 3.960542 | 4.133472 | -4.3434  |
| H | 4.878953 | 4.729027 | -2.95407 |
| C | 2.52858  | -0.7796  | 0.637422 |
| C | 3.939949 | -0.74253 | 0.65528  |
| H | 4.466189 | 0.015257 | 0.077475 |
| C | 4.670725 | -1.65347 | 1.412612 |
| H | 5.761556 | -1.59099 | 1.394736 |
| C | 4.053024 | -2.64131 | 2.192445 |
| C | 2.651856 | -2.66513 | 2.188394 |
| H | 2.126379 | -3.40759 | 2.793703 |
| C | 1.904857 | -1.75887 | 1.441704 |
| H | 0.81468  | -1.80527 | 1.493673 |
| C | 4.858732 | -3.60648 | 3.020815 |
| H | 4.242964 | -4.44588 | 3.368837 |
| H | 5.283958 | -3.12145 | 3.91309  |
| H | 5.701792 | -4.02366 | 2.452485 |
| C | -0.9677  | 2.012008 | 1.82372  |
| C | -1.84986 | 2.999848 | 1.310521 |
| C | -1.66778 | 4.326995 | 1.715012 |
| H | -2.33436 | 5.097295 | 1.327581 |
| C | -0.65514 | 4.684385 | 2.599579 |
| H | -0.52974 | 5.725958 | 2.898121 |
| C | 0.193288 | 3.705362 | 3.103163 |
| H | 0.979692 | 3.988766 | 3.803712 |
| C | 0.060946 | 2.358615 | 2.739126 |
| C | -3.00784 | 2.652807 | 0.38495  |

|   |          |          |          |
|---|----------|----------|----------|
| H | -2.78035 | 1.68437  | -0.07839 |
| C | -3.19625 | 3.665801 | -0.75169 |
| H | -3.57462 | 4.630993 | -0.38614 |
| H | -3.93129 | 3.285913 | -1.47372 |
| H | -2.26081 | 3.850175 | -1.293   |
| C | -4.31659 | 2.496017 | 1.178864 |
| H | -4.23808 | 1.723514 | 1.953918 |
| H | -5.14083 | 2.216779 | 0.507212 |
| H | -4.58998 | 3.439422 | 1.673003 |
| C | 1.00547  | 1.342795 | 3.370233 |
| H | 0.816305 | 0.365284 | 2.907992 |
| C | 2.48377  | 1.684593 | 3.130035 |
| H | 2.710366 | 1.806532 | 2.066102 |
| H | 3.122269 | 0.878391 | 3.515083 |
| H | 2.770341 | 2.611625 | 3.646853 |
| C | 0.7573   | 1.212315 | 4.883881 |
| H | 1.012782 | 2.145687 | 5.405107 |
| H | 1.387105 | 0.415399 | 5.303279 |
| H | -0.2879  | 0.980109 | 5.119773 |
| C | -1.2242  | -2.10637 | -1.88597 |
| C | -0.2284  | -2.96778 | -2.40161 |
| C | -0.40876 | -3.50225 | -3.68477 |
| H | 0.35227  | -4.16931 | -4.09205 |
| C | -1.53184 | -3.20421 | -4.44503 |
| H | -1.6528  | -3.63318 | -5.44053 |
| C | -2.50044 | -2.34824 | -3.92891 |
| H | -3.37633 | -2.10991 | -4.53267 |
| C | -2.37325 | -1.77991 | -2.65747 |
| C | 1.024666 | -3.34458 | -1.62889 |
| H | 1.00602  | -2.81105 | -0.67105 |
| C | 2.291486 | -2.90238 | -2.37541 |
| H | 2.442145 | -3.4889  | -3.29294 |
| H | 3.177675 | -3.03701 | -1.74042 |
| H | 2.230097 | -1.84644 | -2.6628  |
| C | 1.09499  | -4.84886 | -1.32372 |
| H | 0.208449 | -5.20335 | -0.78204 |
| H | 1.978218 | -5.06888 | -0.70828 |
| H | 1.175016 | -5.44136 | -2.24619 |
| C | -3.47807 | -0.86261 | -2.1443  |
| H | -3.06621 | -0.2912  | -1.30271 |
| C | -3.9441  | 0.151321 | -3.19878 |
| H | -3.1048  | 0.697438 | -3.64395 |

|   |          |          |          |
|---|----------|----------|----------|
| H | -4.62071 | 0.884891 | -2.73837 |
| H | -4.50346 | -0.3304  | -4.01305 |
| C | -4.686   | -1.66069 | -1.62384 |
| H | -5.12098 | -2.27814 | -2.42306 |
| H | -5.46888 | -0.97694 | -1.26534 |
| H | -4.41923 | -2.32474 | -0.79319 |

**Table S14.** Cartesian coordinates for DFT optimized **4-mod** (S = 0).

| Atom | x        | y        | z        |
|------|----------|----------|----------|
| N    | -0.15357 | 0.433786 | -0.01647 |
| V    | 1.357591 | 0.01808  | -0.01408 |
| N    | 2.274103 | 1.636578 | 0.012407 |
| N    | 1.754267 | -1.24895 | -1.54585 |
| N    | 1.749684 | -1.23359 | 1.53171  |
| C    | 3.732866 | 1.593452 | 0.021568 |
| C    | 1.754153 | 2.990724 | 0.03533  |
| H    | 4.095354 | 0.555765 | 0.005429 |
| H    | 4.145552 | 2.08109  | 0.923465 |
| H    | 4.158337 | 2.113477 | -0.85582 |
| H    | 0.660855 | 2.960931 | 0.027145 |
| H    | 2.104528 | 3.569542 | -0.83936 |
| H    | 2.091327 | 3.53313  | 0.938233 |
| C    | 2.015741 | -2.50508 | 1.262867 |
| C    | 2.01555  | -2.51869 | -1.26268 |
| C    | 2.139847 | -3.11093 | 0.003196 |
| C    | 1.623126 | -0.81509 | 2.922569 |
| C    | 1.619132 | -0.84756 | -2.9409  |
| H    | 1.825124 | -1.64963 | 3.612241 |
| H    | 2.329739 | -0.00353 | 3.146466 |
| H    | 0.60924  | -0.43705 | 3.114207 |
| H    | 1.828084 | -1.6875  | -3.62181 |
| H    | 2.316293 | -0.03108 | -3.17596 |
| H    | 0.60052  | -0.48261 | -3.13357 |
| H    | 2.153615 | -3.18997 | -2.12254 |
| H    | 2.361913 | -4.1761  | 0.008995 |
| H    | 2.158433 | -3.16588 | 2.130097 |

**Table S15.** Cartesian coordinates for DFT optimized product of CO and **4-mod** (S = 1).

| Atom | x        | y        | z        |
|------|----------|----------|----------|
| N    | 0.016268 | 0.284554 | -0.01246 |
| V    | 1.909837 | 0.038647 | 0.015338 |
| N    | 2.643934 | 1.765993 | 0.027162 |
| N    | 2.095033 | -1.23096 | -1.49061 |
| N    | 2.052539 | -1.26114 | 1.500926 |
| C    | 4.073282 | 2.028884 | 0.031721 |
| C    | 1.849322 | 2.98446  | 0.039521 |
| H    | 4.642172 | 1.085618 | 0.024478 |
| H    | 4.386841 | 2.597362 | 0.92787  |
| H    | 4.389066 | 2.612227 | -0.85402 |
| H    | 0.781848 | 2.743339 | 0.035636 |
| H    | 2.066837 | 3.612956 | -0.84456 |
| H    | 2.065331 | 3.595672 | 0.936085 |
| C    | 1.728729 | -2.53411 | 1.241229 |
| C    | 1.762567 | -2.50821 | -1.26604 |
| C    | 1.497062 | -3.09403 | -0.0216  |
| C    | 2.613894 | -0.96375 | 2.817678 |
| C    | 2.693063 | -0.90618 | -2.7844  |
| H    | 3.706782 | -1.09011 | 2.816657 |
| H    | 2.392305 | 0.073581 | 3.096846 |
| H    | 2.194508 | -1.62635 | 3.591844 |
| H    | 3.786184 | -1.02636 | -2.75258 |
| H    | 2.473469 | 0.134877 | -3.0507  |
| H    | 2.301335 | -1.55733 | -3.58238 |
| H    | 1.71577  | -3.1653  | -2.14493 |
| H    | 1.183631 | -4.13641 | -0.0367  |
| H    | 1.660201 | -3.20979 | 2.104465 |
| C    | -1.16866 | 0.056852 | -0.01034 |
| O    | -2.34433 | -0.1362  | -0.01092 |

**Table S16.** Cartesian coordinates for DFT optimized intermediate product on reaction pathway of CO + **4-mod** (S = 0).

| Atom | x        | y        | z        |
|------|----------|----------|----------|
| N    | 0.01543  | 0.010759 | -0.01689 |
| V    | 1.598879 | 0.009613 | -0.00079 |
| N    | 2.113668 | 1.84468  | 0.002337 |
| N    | 1.947494 | -2.00876 | -0.46754 |
| N    | 1.923493 | -0.46701 | 1.983727 |

|   |          |          |          |
|---|----------|----------|----------|
| C | 3.510641 | 2.152852 | -0.23139 |
| C | 1.262853 | 3.014925 | 0.014328 |
| H | 4.116664 | 1.221149 | -0.28968 |
| H | 3.931279 | 2.77408  | 0.597491 |
| H | 3.663884 | 2.725889 | -1.18069 |
| H | 0.211939 | 2.70905  | 0.175716 |
| H | 1.334224 | 3.58921  | -0.94461 |
| H | 1.566711 | 3.715209 | 0.831635 |
| C | 1.506482 | -1.62531 | 2.476244 |
| C | 1.521756 | -2.9448  | 0.372154 |
| C | 1.183908 | -2.77055 | 1.726709 |
| C | 2.453566 | 0.525745 | 2.904404 |
| C | 2.491563 | -2.45192 | -1.7418  |
| H | 2.368855 | 0.185668 | 3.9624   |
| H | 3.529675 | 0.726849 | 2.699572 |
| H | 1.911906 | 1.489573 | 2.793452 |
| H | 2.519249 | -3.56363 | -1.81211 |
| H | 3.530375 | -2.08012 | -1.88326 |
| H | 1.886002 | -2.06647 | -2.59305 |
| H | 1.475263 | -3.98405 | -0.01924 |
| H | 0.817602 | -3.65003 | 2.272935 |
| H | 1.453678 | -1.7153  | 3.582735 |
| C | 1.440839 | 0.410391 | -2.03146 |
| O | 1.142282 | 0.843408 | -3.05717 |

**Table S17.** Cartesian coordinates for DFT optimized **11** ( $S = 0$ ).

| Atom | x        | y        | z        |
|------|----------|----------|----------|
| Mo   | -1.29294 | 0.650365 | -0.67555 |
| N    | -2.91871 | 0.371914 | -0.6648  |
| N    | -1.39225 | 2.560232 | -1.47753 |
| N    | -2.35678 | 3.178113 | -1.87131 |
| N    | -3.22504 | 3.82462  | -2.27792 |
| N    | -1.07035 | 1.175771 | 1.281618 |
| C    | 0.204541 | 0.890463 | 1.826164 |
| C    | 1.378824 | 1.193444 | 1.081572 |
| C    | 2.626603 | 0.809123 | 1.574533 |
| H    | 3.525081 | 1.043643 | 1.005062 |
| C    | 2.754012 | 0.136417 | 2.790804 |
| H    | 3.744609 | -0.15074 | 3.14788  |
| C    | 1.621681 | -0.16673 | 3.548844 |

|   |          |          |          |
|---|----------|----------|----------|
| C | 0.37032  | 0.206185 | 3.04447  |
| H | -0.51637 | -0.09789 | 3.59753  |
| N | 1.220856 | 1.905989 | -0.15833 |
| C | 2.340916 | 1.785456 | -1.09388 |
| H | 3.245681 | 2.323802 | -0.75139 |
| H | 2.039503 | 2.224245 | -2.05279 |
| H | 2.594583 | 0.733751 | -1.25623 |
| C | 0.949768 | 3.33547  | 0.096562 |
| H | 0.080955 | 3.436958 | 0.751502 |
| H | 0.718606 | 3.835694 | -0.84901 |
| H | 1.822294 | 3.821201 | 0.570892 |
| C | 1.725918 | -0.88638 | 4.868174 |
| H | 2.722476 | -1.3234  | 5.007874 |
| H | 0.98877  | -1.69774 | 4.947007 |
| H | 1.544128 | -0.20447 | 5.712456 |
| C | -2.13723 | 1.748988 | 2.195142 |
| C | -1.52456 | 2.530452 | 3.374727 |
| H | -1.03582 | 1.900032 | 4.122716 |
| H | -2.32825 | 3.079708 | 3.881975 |
| H | -0.78752 | 3.264814 | 3.023503 |
| C | -3.07901 | 0.650211 | 2.714381 |
| H | -3.58423 | 0.156178 | 1.876079 |
| H | -3.85078 | 1.094964 | 3.358483 |
| H | -2.5523  | -0.11181 | 3.302297 |
| C | -2.9836  | 2.762777 | 1.403717 |
| H | -2.35728 | 3.565225 | 0.99455  |
| H | -3.72289 | 3.217798 | 2.076329 |
| H | -3.52674 | 2.288624 | 0.581883 |
| N | -0.41626 | -1.23366 | -0.68335 |
| C | 0.636207 | -1.26764 | -1.6118  |
| C | 0.431316 | -0.56965 | -2.83034 |
| C | 1.420937 | -0.53219 | -3.80647 |
| H | 1.263436 | 0.01357  | -4.73521 |
| C | 2.636907 | -1.19011 | -3.60603 |
| H | 3.406936 | -1.14412 | -4.37732 |
| C | 2.872943 | -1.89596 | -2.42179 |
| C | 1.873692 | -1.91782 | -1.44177 |
| H | 2.080916 | -2.41862 | -0.49954 |
| N | -0.8665  | 0.098093 | -2.96147 |
| C | -1.90235 | -0.87705 | -3.41056 |
| H | -1.6614  | -1.24983 | -4.41883 |
| H | -2.87696 | -0.37927 | -3.4193  |



|   |          |          |          |
|---|----------|----------|----------|
| H | -1.94197 | -1.7121  | -2.71041 |
| C | -0.8494  | 1.216052 | -3.92673 |
| H | -0.09659 | 1.955191 | -3.64248 |
| H | -1.82958 | 1.700117 | -3.92702 |
| H | -0.65139 | 0.854408 | -4.948   |
| C | 4.174124 | -2.62013 | -2.19442 |
| H | 4.485239 | -2.57066 | -1.14268 |
| H | 4.98108  | -2.2014  | -2.80866 |
| H | 4.084493 | -3.68558 | -2.45488 |
| C | -0.82918 | -2.52615 | -0.02027 |
| C | -2.27182 | -2.39389 | 0.474392 |
| H | -2.36242 | -1.61283 | 1.235747 |
| H | -2.58826 | -3.34611 | 0.920846 |
| H | -2.95974 | -2.14538 | -0.34106 |
| C | 0.053248 | -2.83657 | 1.208364 |
| H | 1.063719 | -3.16153 | 0.93697  |
| H | -0.40251 | -3.65313 | 1.787069 |
| H | 0.139742 | -1.95761 | 1.853908 |
| C | -0.77242 | -3.71468 | -0.99673 |
| H | -1.47756 | -3.58604 | -1.82864 |
| H | -1.05399 | -4.63285 | -0.46415 |
| H | 0.227858 | -3.86838 | -1.41738 |

**Table S18.** Cartesian coordinates for DFT optimized  $\text{OCN}(\text{N}_3)\text{Mo}(\text{N}[\text{R}]\text{Ar}_{\text{MeL}})_2$  ( $S = 1$ ).

| Atom | x        | y        | z        |
|------|----------|----------|----------|
| Mo   | -1.05822 | 0.760248 | -0.61784 |
| N    | -2.98965 | 0.244665 | -0.87384 |
| N    | -1.56675 | 2.619648 | -1.32775 |
| N    | -2.56375 | 3.145809 | -1.76628 |
| N    | -3.46359 | 3.71812  | -2.21655 |
| N    | -1.1193  | 1.170727 | 1.36693  |
| C    | 0.117349 | 0.867144 | 1.968211 |
| C    | 1.282556 | 1.085982 | 1.189069 |
| C    | 2.540269 | 0.766776 | 1.682379 |
| H    | 3.429829 | 0.941508 | 1.079208 |
| C    | 2.682104 | 0.201604 | 2.953755 |
| H    | 3.676363 | -0.05621 | 3.320828 |
| C    | 1.558603 | -0.03813 | 3.746889 |
| C    | 0.294156 | 0.288645 | 3.238703 |
| H    | -0.57936 | 0.038856 | 3.836005 |

|   |          |          |          |
|---|----------|----------|----------|
| N | 1.058869 | 1.709611 | -0.11698 |
| C | 2.181808 | 1.511177 | -1.05777 |
| H | 3.076011 | 2.066304 | -0.73173 |
| H | 1.888815 | 1.894986 | -2.03956 |
| H | 2.428095 | 0.45197  | -1.15072 |
| C | 0.908682 | 3.183598 | 0.088334 |
| H | 0.083435 | 3.375932 | 0.776035 |
| H | 0.675787 | 3.660106 | -0.86784 |
| H | 1.842263 | 3.593533 | 0.502949 |
| C | 1.684735 | -0.64836 | 5.118251 |
| H | 2.692359 | -1.04673 | 5.288555 |
| H | 0.968718 | -1.46915 | 5.262676 |
| H | 1.485055 | 0.094074 | 5.905214 |
| C | -2.23622 | 1.720007 | 2.228187 |
| C | -1.68625 | 2.604983 | 3.365836 |
| H | -1.15499 | 2.05434  | 4.147001 |
| H | -2.528   | 3.123418 | 3.842964 |
| H | -1.00437 | 3.370585 | 2.972033 |
| C | -3.11337 | 0.591663 | 2.799515 |
| H | -3.61221 | 0.045217 | 1.990895 |
| H | -3.89344 | 1.021837 | 3.443255 |
| H | -2.54651 | -0.12943 | 3.400146 |
| C | -3.13745 | 2.628732 | 1.379908 |
| H | -2.5717  | 3.47476  | 0.972668 |
| H | -3.9385  | 3.028089 | 2.015559 |
| H | -3.60343 | 2.089128 | 0.552513 |
| N | -0.30195 | -1.17949 | -0.72255 |
| C | 0.670535 | -1.2828  | -1.73295 |
| C | 0.48978  | -0.5003  | -2.90414 |
| C | 1.437536 | -0.50467 | -3.92266 |
| H | 1.290035 | 0.102942 | -4.81391 |
| C | 2.594693 | -1.27856 | -3.82009 |
| H | 3.331751 | -1.25937 | -4.62407 |
| C | 2.803932 | -2.07637 | -2.69131 |
| C | 1.845622 | -2.0631  | -1.67181 |
| H | 2.047346 | -2.64827 | -0.77984 |
| N | -0.74284 | 0.282004 | -2.96624 |
| C | -1.83694 | -0.58644 | -3.48798 |
| H | -1.59374 | -0.92115 | -4.50904 |
| H | -2.77375 | -0.02271 | -3.49713 |
| H | -1.95636 | -1.45428 | -2.83679 |
| C | -0.64674 | 1.462082 | -3.84953 |

|   |          |          |          |
|---|----------|----------|----------|
| H | 0.150274 | 2.131385 | -3.5125  |
| H | -1.59256 | 2.00737  | -3.81626 |
| H | -0.46368 | 1.170684 | -4.89547 |
| C | 4.029839 | -2.9434  | -2.56905 |
| H | 4.348743 | -3.05024 | -1.52412 |
| H | 4.871584 | -2.53461 | -3.14227 |
| H | 3.836282 | -3.95638 | -2.95344 |
| C | -0.68352 | -2.45032 | 0.00804  |
| C | -2.0799  | -2.28606 | 0.613639 |
| H | -2.12997 | -1.40279 | 1.255897 |
| H | -2.31424 | -3.16894 | 1.223159 |
| H | -2.84684 | -2.19067 | -0.16011 |
| C | 0.278195 | -2.73535 | 1.182607 |
| H | 1.3042   | -2.95459 | 0.87019  |
| H | -0.08355 | -3.61046 | 1.741375 |
| H | 0.311664 | -1.88146 | 1.866845 |
| C | -0.74106 | -3.66266 | -0.93959 |
| H | -1.44152 | -3.47835 | -1.76533 |
| H | -1.10649 | -4.53629 | -0.38325 |
| H | 0.229817 | -3.92668 | -1.37156 |
| C | -4.14651 | -0.05098 | -1.00909 |
| O | -5.29517 | -0.35675 | -1.1408  |

**Table S19.** Cartesian coordinates for constrained H-atom only DFT optimization of **12** starting from crystal structure coordinates ( $S = 1$ ).

| Atom | x        | y        | z        |
|------|----------|----------|----------|
| V    | -1.02066 | -0.09805 | 1.256501 |
| Cl   | -2.57278 | -0.19793 | 2.972415 |
| N    | -0.9788  | 2.165767 | 1.528407 |
| N    | -1.42065 | 0.559274 | -0.51735 |
| N    | 0.852707 | -0.63044 | 1.234581 |
| N    | -1.12415 | -2.35001 | 1.130828 |
| C    | 1.648657 | -0.0369  | 3.441495 |
| H    | 0.75941  | 0.596187 | 3.515838 |
| H    | 2.45159  | 0.435767 | 4.025472 |
| H    | 1.400765 | -0.98841 | 3.930336 |
| C    | 0.944108 | -1.56451 | 0.18808  |
| C    | -0.10225 | -2.52824 | 0.121178 |
| C    | -0.49541 | 1.599735 | -0.76138 |
| C    | 3.103779 | -1.41101 | 2.039348 |

|   |          |          |          |
|---|----------|----------|----------|
| H | 2.632666 | -2.35559 | 2.342465 |
| H | 3.881223 | -1.17197 | 2.778526 |
| H | 3.601407 | -1.57838 | 1.078895 |
| C | 2.758791 | 0.976188 | 1.438265 |
| H | 3.107509 | 0.812234 | 0.411261 |
| H | 3.635103 | 1.251991 | 2.044598 |
| H | 2.082377 | 1.834581 | 1.404562 |
| C | 1.911804 | -1.59368 | -0.80603 |
| H | 2.678766 | -0.82054 | -0.82683 |
| C | -0.66556 | -2.93827 | 2.412752 |
| H | -0.56546 | -4.03039 | 2.310061 |
| H | -1.39451 | -2.70309 | 3.195561 |
| H | 0.298984 | -2.50981 | 2.687142 |
| C | -3.70121 | -0.16831 | -0.83239 |
| H | -3.5092  | -0.90528 | -0.04805 |
| H | -4.43602 | -0.59529 | -1.52997 |
| H | -4.16612 | 0.698454 | -0.34523 |
| C | -0.09789 | -3.49328 | -0.85518 |
| H | -0.89019 | -4.24156 | -0.89615 |
| C | -0.26246 | 2.478137 | 0.313346 |
| C | 0.611926 | 3.545157 | 0.178145 |
| H | 0.77029  | 4.24598  | 0.9974   |
| C | 1.160548 | 2.824369 | -2.06169 |
| C | 0.250754 | 1.776624 | -1.92297 |
| H | 0.1483   | 1.056998 | -2.73397 |
| C | -2.42339 | 0.241132 | -1.56914 |
| C | 1.905847 | -2.56133 | -1.81699 |
| C | -0.39605 | 2.735005 | 2.753332 |
| H | 0.674272 | 2.528444 | 2.808753 |
| H | -0.90104 | 2.281013 | 3.613433 |
| H | -0.54238 | 3.827119 | 2.801483 |
| C | 1.304578 | 3.71341  | -1.01631 |
| H | 2.001686 | 4.548648 | -1.11109 |
| C | -2.37692 | 2.700093 | 1.442776 |
| H | -2.34607 | 3.799291 | 1.383484 |
| H | -2.93478 | 2.382655 | 2.328152 |
| H | -2.86447 | 2.298427 | 0.55364  |
| C | 0.891909 | -3.51043 | -1.8217  |
| H | 0.869494 | -4.27466 | -2.60057 |
| C | 2.081956 | -0.26272 | 2.003653 |
| C | -2.79289 | 1.472021 | -2.40698 |
| H | -3.04995 | 2.326926 | -1.76779 |

|   |          |          |          |
|---|----------|----------|----------|
| H | -3.67425 | 1.234754 | -3.01903 |
| H | -1.99538 | 1.790776 | -3.08622 |
| C | 2.957163 | -2.53623 | -2.89064 |
| H | 2.81213  | -3.34851 | -3.61374 |
| H | 3.968322 | -2.6402  | -2.47063 |
| H | 2.94065  | -1.58751 | -3.44738 |
| C | -1.96448 | -0.8863  | -2.48535 |
| H | -1.06509 | -0.61196 | -3.05014 |
| H | -2.74961 | -1.13817 | -3.21388 |
| H | -1.71699 | -1.79004 | -1.92073 |
| C | 2.000603 | 2.958827 | -3.29412 |
| H | 2.401365 | 3.974921 | -3.39885 |
| H | 1.433767 | 2.723952 | -4.2055  |
| H | 2.860789 | 2.27173  | -3.26834 |
| C | -2.40685 | -3.02639 | 0.792767 |
| H | -2.71894 | -2.77039 | -0.22159 |
| H | -3.16443 | -2.6897  | 1.508254 |
| H | -2.3088  | -4.12113 | 0.866709 |

**Table S20.** Cartesian coordinates for H-atom only DFT optimization of **13** starting from crystal structure coordinates(S = 1.5).

| Atom | x        | y        | z        |
|------|----------|----------|----------|
| C    | 2.423317 | -1.21416 | 0.784679 |
| C    | 3.124541 | -0.0742  | 0.301948 |
| C    | 4.487892 | -0.11045 | 0.055062 |
| H    | 4.999862 | 0.784967 | -0.3014  |
| C    | 5.223196 | -1.27457 | 0.246765 |
| H    | 6.292001 | -1.28668 | 0.02834  |
| C    | 4.587569 | -2.40745 | 0.721258 |
| C    | 3.214722 | -2.3771  | 0.977049 |
| H    | 2.756911 | -3.29315 | 1.334011 |
| C    | 5.360604 | -3.67868 | 0.998841 |
| H    | 6.262119 | -3.74508 | 0.376035 |
| H    | 4.750488 | -4.57167 | 0.810538 |
| H    | 5.686068 | -3.72159 | 2.049383 |
| C    | 0.279653 | -2.13426 | 1.651437 |
| C    | 0.803705 | -2.47732 | 3.059743 |
| H    | 1.811781 | -2.90292 | 3.062512 |
| H    | 0.133952 | -3.20014 | 3.546633 |
| H    | 0.827323 | -1.56784 | 3.676047 |

|   |          |          |          |
|---|----------|----------|----------|
| C | 0.147024 | -3.38896 | 0.774143 |
| H | -0.31593 | -3.12558 | -0.18563 |
| H | -0.49765 | -4.1321  | 1.26528  |
| H | 1.1022   | -3.87421 | 0.552806 |
| C | -1.13274 | -1.57111 | 1.84524  |
| H | -1.1118  | -0.69389 | 2.505821 |
| H | -1.78665 | -2.32321 | 2.309866 |
| H | -1.59055 | -1.2786  | 0.888958 |
| C | 2.722571 | 1.996943 | -0.97457 |
| H | 3.736268 | 2.418413 | -0.87628 |
| H | 2.012173 | 2.825737 | -1.07129 |
| H | 2.68186  | 1.384404 | -1.88031 |
| C | 2.598855 | 1.944321 | 1.440205 |
| H | 2.297083 | 1.342103 | 2.303624 |
| H | 2.026905 | 2.879728 | 1.428197 |
| H | 3.669535 | 2.191302 | 1.536131 |
| C | -2.4747  | 1.086968 | -0.82165 |
| C | -2.374   | 1.962376 | 0.295174 |
| C | -3.47848 | 2.598284 | 0.826497 |
| H | -3.36476 | 3.277619 | 1.672383 |
| C | -4.74533 | 2.399397 | 0.290632 |
| H | -5.60694 | 2.907366 | 0.72653  |
| C | -4.89751 | 1.572199 | -0.80316 |
| C | -3.78334 | 0.929588 | -1.35009 |
| H | -3.94787 | 0.296325 | -2.21571 |
| C | -6.25511 | 1.358324 | -1.43167 |
| H | -6.72149 | 0.427749 | -1.07344 |
| H | -6.18466 | 1.284329 | -2.52491 |
| H | -6.94132 | 2.180068 | -1.19005 |
| C | -1.22341 | -0.26949 | -2.50054 |
| C | 0.250527 | -0.67176 | -2.65658 |
| H | 0.590603 | -1.29906 | -1.81962 |
| H | 0.888824 | 0.221029 | -2.70946 |
| H | 0.39962  | -1.24481 | -3.58326 |
| C | -2.04903 | -1.56915 | -2.46953 |
| H | -3.12849 | -1.40419 | -2.41079 |
| H | -1.76043 | -2.17512 | -1.60127 |
| H | -1.85504 | -2.16333 | -3.37435 |
| C | -1.58835 | 0.605744 | -3.70785 |
| H | -1.46362 | 0.043386 | -4.64433 |
| H | -0.92531 | 1.481148 | -3.74613 |
| H | -2.61946 | 0.973471 | -3.67381 |

|   |          |          |          |
|---|----------|----------|----------|
| C | -0.54611 | 3.492249 | 0.165184 |
| H | -0.56351 | 3.376886 | -0.92373 |
| H | 0.475674 | 3.721201 | 0.489966 |
| H | -1.19992 | 4.335837 | 0.444371 |
| C | -0.96739 | 2.366272 | 2.273053 |
| H | -1.47815 | 3.278545 | 2.621073 |
| H | 0.078124 | 2.413648 | 2.594988 |
| H | -1.44448 | 1.495437 | 2.730716 |
| N | 1.071268 | -1.06472 | 1.002056 |
| N | 2.345    | 1.167037 | 0.197769 |
| N | -1.30045 | 0.49325  | -1.23751 |
| N | -1.01547 | 2.229447 | 0.789984 |
| V | 0.219638 | 0.543412 | 0.10801  |
